1 **Flavonols and dihydroflavonols inhibit the main protease activity of SARS-CoV-2 and**  
2 **the replication of human coronavirus 229E**

3

4 Yue Zhu<sup>1</sup>, Frank Scholle<sup>2</sup>, Samantha C. Kisthardt<sup>2</sup> De-Yu Xie<sup>1\*</sup>

5 1, Department of Plant and Microbial Biology, North Carolina State University, Raleigh, NC,

6 USA.

7 2, Department of Biology, North Carolina State University, Raleigh, NC, USA.

8

9 \* Corresponding author, [dxie@ncsu.edu](mailto:dxie@ncsu.edu)

10

11 **Abstract**

12 Since December 2019, the deadly novel severe acute respiratory syndrome coronavirus 2  
13 (SARS-CoV-2) has caused the current COVID-19 pandemic. To date, vaccines are available  
14 in the developed countries to prevent the infection of this virus, however, medicines are  
15 necessary to help control COVID-19. Human coronavirus 229E (HCoV-229E) causes the  
16 common cold. The main protease ( $M^{pro}$ ) is an essential enzyme required for the multiplication  
17 of these two viruses in the host cells, and thus is an appropriate candidate to screen potential  
18 medicinal compounds. Flavonols and dihydroflavonols are two groups of plant flavonoids. In  
19 this study, we report docking simulation with two  $M^{pro}$  enzymes and five flavonols and three  
20 dihydroflavonols, *in vitro* inhibition of the SARS-CoV-2  $M^{pro}$ , and *in vitro* inhibition of the  
21 HCoV 229E replication. The docking simulation results predicted that (+)-dihydrokaempferol,  
22 (+)-dihydroquercetin, (+)-dihydromyricetin, kaempferol, quercetin, myricetin, isoquercetin,  
23 and rutin could bind to at least two subsites (S1, S1', S2, and S4) in the binding pocket and  
24 inhibit the activity of SARS-CoV-2  $M^{pro}$ . Their affinity scores ranged from -8.8 to -7.4.  
25 Likewise, these compounds were predicted to bind and inhibit the HCoV-229E  $M^{pro}$  activity  
26 with affinity scores ranging from -7.1 to -7.8. *In vitro* inhibition assays showed that seven  
27 available compounds effectively inhibited the SARS-CoV-2  $M^{pro}$  activity and their IC50  
28 values ranged from 0.125 to 12.9  $\mu$ M. Five compounds inhibited the replication of  
29 HCoV-229E in Huh-7 cells. These findings indicate that these antioxidative flavonols and  
30 dihydroflavonols are promising candidates for curbing the two viruses.

31

32 **Keywords:** (+)-dihydrokaempferol, (+)-dihydroquercetin, (+)-dihydromyricetin, kaempferol,  
33 quercetin, myricetin, isoquercetin, rutin, flavan-3-ols

34 **Introduction**

35

36 SARS-CoV-2 is the abbreviation of the novel severe acute respiratory syndrome coronavirus  
37 2. This virus was firstly reported to cause a severe pneumonia in December of 2019 in Wuhan,  
38 China (Wang et al. 2020a; Zhu et al. 2020; Ding et al. 2020). On February 11, 2020, the  
39 World Health Organization (WHO) designated this pneumonia as coronavirus disease 2019  
40 (COVID-19). COVID-19 the rapidly spread different countries. On March 11, 2020, WHO  
41 announced the COVID-19 pandemic (WHO 2020b, a). This pandemic has rapidly spread  
42 across all over the world. By June 21, 2021, based on the COVID-19 Dashboard by Center  
43 for Systems Science and Engineering at Johns Hopkins Coronavirus Resource Center,  
44 117,553,726 infected cases and 3,867,641 deaths have been reported from more than 200  
45 countries or regions. No strategy to stop the spread of this virus was available until January  
46 2021, when several vaccines started to be approved for vaccination in several countries (Kim  
47 et al. 2021; Knoll and Wonodi 2021; Painter et al. 2021; Dooling et al. 2021; CDC and FDA  
48 2021; Gharpure et al. 2021). On one hand, since the start of vaccination, the number of  
49 infections has started to decrease. On the other hand, due to the insufficient vaccine quantities  
50 and vaccine hesitancy even where available, in the first week of February, 2021, the daily  
51 infection cases and deaths were still more than 400,000 and 11,000, respectively. By Feb. 9,  
52 the case numbers still increased by more than 300,000 daily. Meanwhile, the use of vaccines  
53 has also indicated that developing effective medicines is necessary to stop COVID-19. A  
54 recent study showed that mutations in the spike protein of SARS-CoV-2 might cause the  
55 escape of new variants from antibody (McCarthy et al. 2020). The variant B.1.351 found in

56 South Africa was reported to be able to escape vaccines developed by AstraZeneca, Johnson  
57 & Johnson (J&J), and Novavax (Cohen 2021). Merck & Co has stopped their race for  
58 vaccines due to the lack of effectiveness of their products, instead, they continue to focus on  
59 antiviral drug development (Kenilworth 2021). Unfortunately, to date, effective medicines are  
60 still under screening. Although chloroquine and hydroxychloroquine were reported to be  
61 potentially effective in helping to improve COVID-19 (Wang et al. 2020b), the use of these  
62 two anti-malarial medicines has been arguable in USA because of potential risk concerns  
63 (Bull-Otterson et al. 2020). Other potential candidate medicines are the combination of  
64  $\alpha$ -interferon and anti-HIV drugs lopinavir/ritonavir (Cao et al. 2020), and remdesivir (Wang  
65 et al. 2020b; Holshue et al. 2020). Given that the efficacy of all these medicines being  
66 repurposed has not been conclusive, further studies are necessary to apply them for treating  
67 COVID-19.

68

69 SARS-CoV-2 is a single stranded RNA virus. Its genomic RNA contains around 30,000  
70 nucleotides and forms a positive sense strand with a 5' methylated cap and a 3'  
71 polyadenylated tail that encodes at least six open reading frames (ORF) (Chen et al. 2020;  
72 Hussain et al. 2005). This feature allows it to be able to use the ribosomes of the host cells to  
73 translate proteins. The longest ORF (ORF1a/b) translates two polyproteins, which are cleaved  
74 by one main protease ( $M^{pro}$ , a 3C-like protease,  $3CL^{pro}$ ) and another papain-like protease  
75 (PL2pro) into 16 nonstructural proteins (NSPs), which include RNA-dependent RNA  
76 polymerase (RdRp, nsp12), RNA helicase (nsp13), and exoribonuclease (nsp14). The NSPs  
77 subsequently produce structural and accessory proteins. The structural proteins include an

78 envelope protein, membrane protein, spike (S) protein, and nucleocapsid protein (Fig.1)  
79 (Ramajayam et al. 2011; Ren et al. 2013). The S protein is a type of glycoprotein and plays an  
80 essential role in the attachment and the infection of the host cells (Zhao et al. 2020). It binds  
81 to the human angiotensin converting enzyme 2 to help the virus enter the human cells  
82 (Hoffmann et al. 2020; Yan et al. 2020). Since May 2020, the mutations of amino acids of the  
83 S protein has created a large number of variants, of which the emergence of alpha, beta,  
84 gamma, and delta variants has shown more pathogenic and transmissible, thus caused  
85 potential challenges to use vaccines to completely control the pandemic (Abdool Karim and  
86 de Oliveira 2021; Walensky et al. 2021; Fontanet et al. 2021; Altmann et al. 2021; Petra et al.  
87 2021).

88

89 Human coronavirus 229E (HCoV-229E) is a pathogenic virus in the genus *Alphacoronavirus*  
90 (Woo et al. 2010). It is one of the causative viral agents of the common cold (Gaunt et al.  
91 2010; Shirato et al. 2017). Its genome consists of a positive sense and single-stranded RNA  
92 with 27,317 nucleotides (nt). Its genome size commonly varies in different clinical isolates.  
93 For example, HCoV-229E strains 0349 and J0304 were two clinical isolates causing the  
94 common cold (Farsani et al. 2012). The entire genome of these two clinical isolates were  
95 reported to be about 27, 240 nt, which included 38.07 % GC content is in 0349 and 38.13 %  
96 GC content in J0304. In general, the genome of HCoV-229E is characterized with a gene  
97 order of 5'-replicase ORF1a/b, spike (S), envelope (E), membrane (M), nucleocapsid (N)-3'  
98 (Fehr and Perlman 2015), Like SARS-CoV-2, the spike protein is the determinant of  
99 infections to host cells (Shirato et al. 2012). The ORF1a/b of HCoV-229E encodes 16

100 non-structural proteins (NSPs). The *NSP5* encodes the  $M^{\text{pro}}$  that is required for the replication  
101 in the host cells (Farsani et al. 2012). Given that HCoV-229E is allowed to be studied in  
102 BSL2 laboratories, this pathogenic virus is an appropriate model to screen therapeutics for the  
103 treatment of both common cold and COVID-19.

104

105 Given that the SARS-CoV-2  $M^{\text{pro}}$  not only plays a vital role in the cleavage of polyproteins,  
106 and there is no human homolog, it is an ideal target for anti-SARS-CoV-2 drug screens and  
107 development (Yang et al. 2005; Kim et al. 2016). It belongs to the family of cysteine  
108 proteases and has a Cys-His catalytic dyad, which is an appropriate site to design and screen  
109 antiviral drugs (Dai et al. 2020). Its high-resolution crystal structure was elucidated in April  
110 2020 (Jin et al. 2020). Based on the crystal structure, screening the existing antiviral  
111 medicines or designed chemicals revealed that cinanserin, ebselen, GC376, 11a, and 11b  
112 showed inhibitory effects on the  $M^{\text{pro}}$  activity (Ye et al. 2020; Dai et al. 2020; Jin et al. 2020;  
113 Chen et al. 2005; Zhang and Liu 2020). A common feature is that these molecules deliver  
114 their carbonyl group (aldehyde group or ketone group) to the thiol of the 145 cysteine residue  
115 to form a covalent linkage, thus inhibit the  $M^{\text{pro}}$  activity. The potential application of these  
116 molecules is still under studies to evaluate their effectiveness and side effects. In addition, we  
117 recently found that flavan-3-ol gallates, such as (-)-epigallocatechin-3-gallate,  
118 (-)-catechin-3-gallate, and (-)-epicatechin-3-gallate, and dimeric procyanidins promisingly  
119 inhibited the  $M^{\text{pro}}$  activity (Zhu and Xie 2020). Docking simulation indicated that their  
120 inhibitory activity likely resulted from the formation of hydrogen bonds between these  
121 compounds and several amino acids in the binding domain of  $M^{\text{pro}}$ .

122

123 Flavonols and dihydroflavonols (Fig. 2) are two main groups of plant flavonoids (Fowler and  
124 Koffas 2009; Hostetler et al. 2017). Quercetin, kaempferol, and myricetin are three flavonol  
125 molecules widely existing in plants. Likewise, dihydroquercetin, dihydrokaempferol, and  
126 dihydromyricetin are three dihydroflavonol molecules in plants (Xie et al. 2004; Xie and  
127 Dixon 2005). In general, flavonols and dihydroflavonols are strong antioxidants with multiple  
128 benefits to human health (Moon et al. 2001; Murota and Terao 2003; Egert et al. 2008;  
129 Chopra et al. 2000; Hertog et al. 1993b; de Vries et al. 1998; Kolhir et al. 1996; Teselkin et al.  
130 1998; Teselkin et al. 2000; Weidmann 2012). Furthermore, studies have reported that  
131 quercetin and its derivatives have antiviral activity (Mehrbood et al. 2021; dos Santos et al.  
132 2014; Cheng et al. 2015). Based on these previous findings, we hypothesized that flavonols  
133 and dihydroflavonols might inhibit the  $M^{pro}$  activity of SARS-CoV-2 and HCoV-229E. In this  
134 study, to test this hypothesis, we performed docking simulation for three dihydroflavonols,  
135 three flavonols, and two glycosylated quercetins. Then, we tested these compound's  
136 inhibition against the recombinant  $M^{pro}$  activity of SARS-CoV-2 *in vitro*. More importantly,  
137 five available compounds were evaluated to determine their inhibitive activity against the  
138 replication of HCoV-229E in Huh-7 cells. The resulting data showed eight compounds  
139 effectively inhibited the  $M^{pro}$  activity of SARS-CoV-2 and five tested compounds inhibited  
140 the replication of HCoV-229E in Huh-7 cells.

141

## 142 **Materials and methods**

143

144 **Dihydroflavonols, flavonols, cell line, and coronavirus**

145

146 Flavonols used in this study included kaempferol, quercetin, myricetin,

147 quercetin-3-O-glycoside, and rutin. Dihydroflavonols used were (+)-taxifolin

148 (dihydroquercetin, DHQ), (+)-dihydrokaempferol (DHK), and (+)-dihydromyricetin (DHM).

149 Two flavan-3-ols, (-)-epicatechin and (+)-catechin, were used as compound controls. The

150 ebselen was used as a positive control. These compounds were purchased from

151 Sigma-Aldrich (<https://www.sigmaaldrich.com/>)

152

153 Huh-7 cells, a human hepatocellular carcinoma cell line, are an appropriate to study the

154 replication of different viruses (Nakabayashi et al. 1984; Shih et al. 1993; Dewi et al. 2020;

155 Thongsri et al. 2019; Logue et al. 2019). This cell line was used for infection and propagation

156 of virus and for testing antiviral activity of compounds. Human coronavirus 229E

157 (HCoV-229E) is a positive sense and single-stranded RNA virus that infects the human

158 respiratory system (Bucknall et al. 1972; Kennedy and Johnsonlussenburg 1976; Hierholzer

159 1976; Macnaughton and Madge 1978; Friedman et al. 2021). HCoV-229E was propagated on

160 Huh-7 cells and tittered by TCID50 assay.

161

162 **Docking simulation of the SARS-CoV-2 M<sup>pro</sup>**

163

164 We recently reported the docking simulation of flavan-3-ols, such as epicatechin and catechin

165 (Fig. 2) (Zhu and Xie 2020). Herein, we used the same steps for docking simulation of



166 flavonols and dihydroflavonols in this experiment. In brief, three main steps were completed,  
167 protein preparation, ligand preparation, and protein-ligand docking. The first step was protein  
168 preparation. The SARS-CoV-2 M<sup>pro</sup> was used as a receptor to test ligands. Its ID is PDB ID:  
169 6LU7 at Protein Data bank (<https://www.rcsb.org/>), from which its 3D structure was  
170 downloaded to a desktop computer and then was prepared as a receptor of ligand via the  
171 Dock Prep tool of UCSF-Chimera (<https://www.cgl.ucsf.edu/chimera/>). Because M<sup>pro</sup>  
172 contains the inhibitor peptide N3, we removed N3 prior to docking simulation. Hydrogens  
173 and charges were added and optimized to allow determining the histidine protonation state.  
174 The second step was ligand preparation. The 3D structures of compounds (Fig. 2) were  
175 obtained from PubChem (<https://pubchem.ncbi.nlm.nih.gov/>) and then used as ligands. All  
176 structures were minimized by using the minimize structure tool of UCSF-Chimera.  
177 Hydrogens and charges were added to the ligands, which were then saved as mol2 format for  
178 the protein-ligand docking simulation. The third step was protein-ligand docking. The  
179 modeling of protein-ligand docking was performed via the publically available AutoDock  
180 Vina (<http://vina.scripps.edu/>) software. The protein and ligand files were loaded to the  
181 AutoDock Vina through the UCSF-Chimera surface binding analysis tools. A working box  
182 was created to contain the whole receptor. The box center was set at x = -27, y = 13, and z =  
183 58. The box size was set as x = 50, y = 55, and z = 50, which framed the entire receptor to  
184 allow free position changes and ligand binding to the receptor at any potential positions.

185

186 **Docking simulation of the HCoV-229E M<sup>pro</sup>**

187

188 HCoV-229E needs a M<sup>pro</sup> (3C-like protease) for its replication in the host cells (Ziebuhr et al.  
189 1997; Ziebuhr et al. 1995; Ziebuhr et al. 1998). The M<sup>pro</sup> is also a target for screening  
190 anti-HCoV-229E medicines (Prior et al. 2013; Chuck et al. 2013; Lee et al. 2009). The  
191 sequence of the HCoV-229E M<sup>pro</sup> was obtained from the GenBank and then used for an  
192 alignment and docking simulation. The steps of simulation were the same as described above.

193

#### 194 **Inhibition assay of the SARS-CoV-2 M<sup>pro</sup> activity**

195

196 (+)-DHQ, (+)-DHK, (+)-DHM, quercetin, kaempferol, myricetin, quercetin-3-O-glycoside,  
197 rutin, (-)-epicatechin, and (+)-catechin were dissolved in DMSO to prepare a 1.0 M solution.  
198 A SARS-CoV-2 Assay Kit (BPS bioscience, <https://bpsbioscience.com/>) was used to test the  
199 inhibitory activity of these compounds. The steps of *in vitro* assay followed the  
200 manufacturer's protocol as performed in our recent report (Zhu and Xie 2020). In brief, each  
201 reaction was carried out in a 25 µl volume in 384-well plates. Each reaction solution contains  
202 150 ng recombinant M<sup>pro</sup> (6 ng/µl), 1 mM DDT, 50 µM fluorogenic substrate, and one  
203 compound (0, 0.02, 0.05, 0.1, 0.5, 1, 5, 10, 50, 100, 150, and 200 µM) in pH 8.0 mM  
204 Tris-HCl and 5 µM EDTA buffer. GC376 (50 µM) was used as a positive control, while  
205 (-)-epicatechin and (+)-catechin were used as two negative controls. The reaction mixtures  
206 were incubated for 2 hrs at room temperature. The fluorescence intensity of each reaction was  
207 measured and recorded on a microtiter plate-reading fluorimeter (BioTek's Synergy H4 Plate  
208 Reader for detect fluorescent and luminescent signals). The excitation wavelength was 360  
209 nm and the detection emission wavelength was 460 nm. Each concentration of every

210 compound was tested five times. A mean value was calculated with five individual replicates.  
211 Plots were built with the percentiles of catalysis versus log [ $\mu\text{M}$ ] values of concentrations to  
212 show the effect of each compound on the  $M^{\text{pro}}$  activity. Statistical evolution is described  
213 below.

214

### 215 **Inhibition assay of Human coronavirus 229E**

216

217 Huh-7 cells were grown in Dulbecco's Modified Eagle Medium (DMEM) supplemented with  
218 10% fetal bovine serum (10% FBS) and 1% antibiotics. HCoV-229E was propagated on  
219 Huh-7 cells. Virus containing supernatants were harvested 72h post infection and stored at  
220  $-80^{\circ}\text{C}$ . The virus titer was determined by the Median Tissue Culture Infectious Dose 50  
221 (TCID<sub>50</sub>) assay in Huh-7 cells.

222

223 Then, we performed virus inhibition assays. Huh-7 cells were seeded in 96 well plates at a  
224 density of 25,000 cells/well and incubated overnight. HCoV 229-E was diluted in MEM with  
225 1% FBS, 1% HEPES buffer, and 1% antibiotic solution (MEM 1+1+1). The cells were  
226 inoculated with HCoV-229E at an MOI of 1 in a total volume of 50  $\mu\text{l}$ . The infected plates  
227 were incubated at  $35^{\circ}\text{C}$  with 5%  $\text{CO}_2$  for one hour. Phytochemicals dissolved in DMSO were  
228 added in cell culture medium to the following concentrations: 0  $\mu\text{M}$ , 2.5  $\mu\text{M}$ , 5  $\mu\text{M}$ , 10  $\mu\text{M}$ ,  
229 20  $\mu\text{M}$ , and 50  $\mu\text{M}$ .

230

231 After one hour, virus and medium were removed from the infected cells and washed once

232 with 200ul of PBS. 100 µl of each compound master mix was added to triplicate wells for  
233 each concentration. Virus was allowed to grow in the presence of each compound at 35 °C  
234 and 5% CO<sub>2</sub> for 24 hours. Supernatants were harvested and virus titers on Huh-7 cells were  
235 determined by TCID<sub>50</sub> assay (Barrett et al. 1996). Plates were incubated at 37°C and 5%  
236 CO<sub>2</sub> for 96 hours, inspected visually for cytopathic effect (CPE) and TCID<sub>50</sub>/mL was  
237 calculated using the Spearman-Kärber method (Kärber 1931; Spearman 1908). A mean  
238 value was calculated using three replicates. Plots were built with TCID<sub>50</sub>/mL versus  
239 concentrations to show the effect of each compound on the replication of virus in Huh-7 cells.  
240 The minimum level of detection in this assay was 632 TCID<sub>50</sub>/ml.

241

## 242 **Statistical evaluation**

243

244 One-way analysis of variance (ANOVA) was performed to evaluate the statistical  
245 significance. The P-value less than 0.05 means significant differences.

246

## 247 **Results**

248

### 249 **Ligand-receptor docking of flavonols and dihydroflavonols to the M<sup>Pro</sup> of SARS-CoV-2**

250

251 Docking simulation was completed with the UCSF-Chimera and AutoDock Vina software to  
252 evaluate the binding abilities of flavonols and dihydroflavonols to the SARS-CoV-2 M<sup>Pro</sup>.

253 The M<sup>Pro</sup> structure is featured with a substrate-binding pocket (Fig.3). When the 3D structure

254 of the protein was downloaded from the public database, the peptide inhibitor N3 was shown  
255 to bind to this pocket. During protein preparation, N3 was removed for docking. The  
256 simulation results showed that (+)-DHQ, (+)-DHK, (+)-DHM, quercetin, kaempferol,  
257 myricetin, quercetin-3-O-glycoside, rutin, (-)-epicatechin, (+)-catechin, and ebselen bound to  
258 the binding pocket (Fig. 3). The resulting affinity scores for (+)-DHQ, (+)-DHK, (+)-DHM,  
259 quercetin, kaempferol, myricetin, quercetin-3-O-glycoside, and rutin ranged from -8.8 to -7.4,  
260 lower and better than the score of ebselen (-6.6) (Table 1). The scores among the aglycones  
261 of (-)-epicatechin, (+)-catechin, three dihydroflavonols, and three flavonol aglycones were  
262 close, either -7.4 or -7.5. These data suggested that dihydroflavonols, flavonols, and  
263 glycosylated flavonols could potentially inhibit the M<sup>pro</sup> activity.

264

#### 265 **Docking features at the binding pocket of the SARS-CoV-2 M<sup>pro</sup>**

266

267 As we reported recently (Zhu and Xie 2020), the M<sup>pro</sup> substrate-binding pocket includes four  
268 subsites, S1', S1, S2, and S4. Cys145 is a critical residue located at the space among subsites  
269 S1, S1', and S2 (Fig.4a) (Dai et al. 2020; Jin et al. 2020). Several studies have reported that  
270 the thiol of the Cys145 residue is crucial for the catalytic activity of M<sup>pro</sup> and if a compound  
271 binds to this residue, it can inhibit the M<sup>pro</sup> activity (Dai et al. 2020; Chen et al. 2005;  
272 Ramajayam et al. 2011). When ebselen was used as our positive compound for simulation, as  
273 we reported recently (Zhu and Xie 2020), it bound to this residue featured by three rings  
274 facing to the S1 and S1' subsites (Fig. 4 b). The docking simulation results showed that three  
275 dihydroflavonols, three flavonols aglycones, and two glycosylated flavonols bound to 2 to 4

276 subsites via the Cys145 residue. In three dihydroflavonols tested, (+)-DHK and (+)-DHQ  
277 showed a difference in their occupation in the binding site. The A and B rings of (+)-DHK  
278 and (+)-DHQ dwelled in the S1' and S2 subsites and their heterocycle C ring resided in the  
279 space between the S1 and S2 subsites (Fig. 4 c-d). The A and B rings of DHM occupied the  
280 S1 and S4 subsites and the heterocycle C ring resided in the space between the S1 and S2  
281 subsites (Fig. 4 e). In three flavonol aglycones tested, the occupation of kaempferol was  
282 different from that of quercetin and myricetin. The A-ring, B-ring, and heterocycle C-ring of  
283 kaempferol resided in the S1', S2, and the space between S1 and S2, respectively (Fig. 4f).  
284 The A-ring, B-ring, and the heterocycle C-ring of quercetin and myricetin dwelled in the S1,  
285 S4, and the space between S1 and S2 (Fig. 4 g-h). In comparison, the residing positions of  
286 isoquercitrin and rutin were more complicated. The A-ring, B-ring, heterocycle C-ring, and  
287 3-glucose of isoquercitrin occupied the S2, S1', the space between S1 and S2, and S1 (Fig. 2  
288 i). The A-ring, B-ring, heterocycle C-ring, 6- $\beta$ -glucopyranose, and 1-L- $\alpha$ -rhamnopyranose of  
289 rutin occupied S4, S1', the space between S1/S2, S1, and S4 (Fig. 4 j). These occupations in  
290 the binding sites suggested that these compounds might have an inhibitive activity against  
291 M<sup>pro</sup>.

292

### 293 **Ligand-receptor docking of flavonols and dihydroflavonols to the M<sup>pro</sup> of HCoV-229E**

294

295 The M<sup>pro</sup> of HCoV-229E was also used for docking simulation. A sequence alignment  
296 revealed that the identity of between the two M<sup>pro</sup> homologs of HCoV-229E and  
297 SARS-CoV-2 was 42.81% (Figure 5 a). The binding domains were highly conserved.

298 Furthermore, a 3D modeling revealed that the conformation and binding pocket of the  
299 HCoV-229E M<sup>pro</sup> were similar to those of SARS-CoV-2 M<sup>pro</sup> (Fig. 5 b and c). The simulation  
300 results were the same as those of the M<sup>pro</sup> of SARS-CoV-2 described above. (+)-DHQ,  
301 (+)-DHK, (+)-DHM, quercetin, kaempferol, myricetin, quercetin-3-O-glycoside, rutin,  
302 (-)-epicatechin, (+)-catechin, and ebselen could bind to the binding pocket of the HCoV-229E  
303 M<sup>pro</sup> (Fig. 6). The affinity scores of these compounds ranged from -7.8 to -7.1 (Table 1). The  
304 scores of rutin and isoquercitrin (two glycosides) binding to the HCoV-229E M<sup>pro</sup> were -7.8  
305 and -7.5, higher than -8.8 and -8.7, the scores of the two compounds binding to the  
306 SARS-CoV-2 M<sup>pro</sup> (Table 1). This result indicates that compared with the affinity score of  
307 quercetin, these two types of glycosylation reduce the affinity scores binding to the  
308 SARS-CoV-2 M<sup>pro</sup>, but do not affect the affinity scores binding to the HCoV-229E M<sup>pro</sup>.

309

### 310 ***In vitro* inhibitory effects of five flavonols and two dihydroflavonols on the SARS-CoV-2**

#### 311 **M<sup>pro</sup> activity**

312

313 (+)-DHQ, (+)-DHM, quercetin, kaempferol, myricetin, isoquercetin  
314 (quercetin-3-O-glycoside), and rutin were used to test their inhibitory effects on the M<sup>pro</sup>  
315 activity. In addition, based on our recent report (Zhu and Xie 2020), (-)-epicatechin and  
316 (+)-catechin were used as negative controls. The resulting data showed that (+)-DHQ,  
317 (+)-DHK, (+)-DHM, quercetin, kaempferol, myricetin, isoquercetin  
318 (quercetin-3-O-glycoside), and rutin inhibited the SARS-CoV-2 M<sup>pro</sup> activity. The half  
319 maximum inhibitory concentrations (IC<sub>50</sub>) were 0.125-12.94 μM (Fig. 7). Among the tested

320 seven compounds, rutin had the lowest IC<sub>50</sub> value with the most effectiveness to inhibit the  
321 M<sup>pro</sup> activity (Fig. 7 g), while (+)-DHQ had the highest IC<sub>50</sub> value with the lowest inhibitive  
322 activity (Fig. 7 d). One hundred μM was used to further compare the inhibitive effects of  
323 these compounds on the M<sup>pro</sup> activity in a given time. The resulting data showed the most  
324 effectiveness of rutin (Fig. 7 h). In addition, as we reported previously, (+)-catechin and  
325 (-)-epicatechin did not show an inhibitory effect on the M<sup>pro</sup> activity in the range of  
326 concentrations from 0-200 μM. For example, the two compounds did not inhibit the catalytic  
327 activity of the M<sup>pro</sup> at 100 μM (Fig. 7 h).

328

### 329 **Inhibitory effects of five compounds on the replication of HCoV-229E in Huh-7 cells**

330

331 Quercetin, isoquercetin, taxifolin, were tested their inhibitory effects on the replication of  
332 HCoV-229E in Huh-7 cells. In addition, epigallocatechin gallate (EGCG), and epicatechin  
333 two examples of flavan-3-ols, were tested. The reason was that we recently reported that  
334 EGCG effectively inhibited the SARS-CoV-2 M<sup>pro</sup> activity, while epicatechin could not (Zhu  
335 and Xie 2020), however whether they could inhibit coronavirus replication in the host cells  
336 was untested. It was essential to test them. The resulting data indicated that all five  
337 compounds showed an inhibition against the replication of HCoV-229E in Huh-7 cells  
338 (Figure 8). Based on TCID<sub>50</sub>/ml values, taxifolin started to show its inhibition at 2.5 μM and  
339 its inhibitory activity increased as its concentration was increased. Quercetin started to have  
340 inhibition at 5 μM. As its concentrations were increased, its inhibitive activities were more  
341 effective. At a concentration tested higher 10 μM, quercetin could strongly inhibit the



342 replication of the virus. Its EC50 value was estimated to be 4.88  $\mu$ M (Figure 8 b).  
343 Isoquercitrin strongly inhibited the replication starting with 2.5  $\mu$ M. EGCG started to show  
344 its inhibition against the replication of the virus at 2.5  $\mu$ M and its inhibition became stronger  
345 as its concentrations were increased. It was interesting that epicatechin could strongly inhibit  
346 the replication starting at 20  $\mu$ M.

347

## 348 **Discussion**

349

350 The development of medicines is necessary to complement the use of vaccines to control  
351 COVID-19. The SARS-CoV-2 M<sup>pro</sup> is one of the targets to screen, repurpose, or develop  
352 drugs to treat or prevent SARS-CoV-2 (Ren et al. 2013; Dai et al. 2020; Ramajayam et al.  
353 2011). One strategy is to inhibit the M<sup>pro</sup> activity via delivering a compound to the Cys145  
354 residue at the space across the region of S1' and S1 subsites (Dai et al. 2020). Ebselen is a  
355 small molecule candidate that has been found to inhibit the M<sup>pro</sup> activity with an IC<sub>50</sub> 0.46  
356  $\mu$ M (Jin et al. 2020). Its structure featured with three rings was revealed to be an effective  
357 vessel to deliver its carbonyl group to the CYS145 residue (Fig. 4 b). We recently reported  
358 another strategy. We have found that epicatechin gallate, epigallocatechin gallate,  
359 gallic acid, catechin gallate, and procyanidin B2 could effectively inhibited the  
360 activity of M<sup>pro</sup> via the formation of hydrogen bonds with different amino acids in the binding  
361 pocket (Zhu and Xie 2020). Our findings indicated that the formation of peptide bonds was  
362 effective to screen more flavonoids to intervene COVID-19. Quercetin and other flavonols  
363 are common nutraceuticals with antiviral activities, such as influenza virus, hepatitis B virus,

364 Zika virus, and Ebola viruses (Mehrbod et al. 2021; Parvez et al. 2020; Wong et al. 2017; Qiu  
365 et al. 2016). In this study, we took advantage of our recent strategy to perform this docking  
366 simulation of flavonols and dihydroflavonols. These two groups of compounds (Figs. 2 and 4)  
367 have C4 keto and 3-OH structures in the heterocycle C-ring. Like flavan-3-ol gallates, the  
368 structures of these two groups might have a potential to reside in the space S1 and S2 subsites.  
369 In the present study, our ligand-docking simulation showed that these two groups of  
370 compounds could bind to the substrate-binding pocket of M<sup>pro</sup> and occupied their heterocyclic  
371 C ring in the crossing region between S1 and S2. Furthermore, the docking results predicted  
372 the A-ring and B-ring of two, three, two, and one compounds could bind to S1' and S2, S1  
373 and S4, S2 and S1', and S4 and S1', respectively (Fig. 4). The docking results further showed  
374 that a glycosylation of quercetin increased the dwelling capacity in the binding site. Rutin  
375 was predicted to occupy all four subsites (Fig. 4 j). The increase of binding subsites was also  
376 reflected by the affinity scores of M<sup>pro</sup>-ligands. Rutin and isoquercitrin had the lowest and  
377 second lowest score values (Table 1). These data indicated that not only might these  
378 compounds have an inhibitive activity but also a lower and better affinity score might  
379 indicate a strong inhibition against the M<sup>pro</sup> activity. Further *in vitro* assays substantiated the  
380 prediction of docking simulation. Seven available compounds inhibited the activity of M<sup>pro</sup>  
381 with IC<sub>50</sub> values from 0.125 to 12.9 μM. These data imply that these compounds might be  
382 potential therapeutics.

383

384 Given that SARS-CoV-2 can be only handled in the BSL-3 laboratories, we cannot access  
385 this deadly virus to test the effects of these compounds on its replication in host cells. Instead,

386 we selected the less pathogenic HCoV-229E to test the inhibitory activity of these compounds.

387 We hypothesized that inhibitory compounds screened against this virus might be appropriate

388 for the potential therapy of COVID-19. The reason is that like SARS-CoV-2, the replication

389 of HCoV-229E also depends on its M<sup>pro</sup> activity in human cells and the active site is highly

390 conserved between HCoV229E and SARS-CoV-2. Accordingly, the resulting data might help

391 design medicines for the therapy of both COVID-19 and HCoV-229E respiratory diseases. An

392 amino sequence alignment revealed that the identity of HCoV-229E and SARS-CoV-2 M<sup>pro</sup>

393 homologs was approximately 48%. The binding domain of substrates between the two

394 homologs was conserved. Docking simulation and the resulting affinity scores further

395 indicated that these compounds could reside in the binding pocket to potentially inhibit the

396 activity of the M<sup>pro</sup> of HCoV-229E (Fig. 4 and Table 1). Based on these data, we could test

397 five compounds with HCoV-229E. In tested concentrations, taxifolin and isoquercitrin

398 starting from 2.5  $\mu$ M showed a significant inhibition of HCoV-229E replication in Huh-7

399 cells. Quercetin could slightly reduce the replication of HCoV-229E at 2.5  $\mu$ M and

400 significantly inhibited the replication of this virus at higher concentrations (Fig. 8 a). These

401 positive results not only supported the docking simulation results that these compounds

402 bound to the M<sup>pro</sup> of HCoV-229E (Table 1), but also substantiated the results of *in vitro*

403 assays that these compounds effectively inhibited the SARS-CoV-2 M<sup>pro</sup> activity (Fig. 7). We

404 previously demonstrated that EGCG could effectively inhibit the activity of the SARS-CoV-2

405 M<sup>pro</sup> (Zhu and Xie 2020). Herein, we used it as a positive control. The resulting data showed

406 that EGCG starting with 2.5  $\mu$ M could significantly inhibit the replication of HCoV-229E in

407 Huh-7 cells. This positive control result further supported that taxifolin, isoquercitrin and

408 quercetin inhibited the replication of HCoV-29E via the reduction of the M<sup>pro</sup> activity. In  
409 addition, we tested epicatechin, which was not shown to have an inhibitive activity against  
410 the SARS-CoV-2 M<sup>pro</sup> in our vitro assays. It was interesting that epicatechin starting with 20  
411  $\mu$ M tested could inhibit the replication of HCoV-229E (Fig. 8 a), which was supported by the  
412 results of the docking simulation and its affinity score (Fig. 6 and Table 1). Accordingly, this  
413 datum indicates the difference between HCoV-229E and SARS-CoV-2. Taken together, these  
414 data indicate that HCoV-229E is appropriate substitute to screen inhibitors of SARS-CoV-2  
415 by targeting the M<sup>pro</sup> of these two viruses.

416

417 Quercetin, isoquercitrin and rutin are three common supplements, given that their nutritional  
418 values benefit human health (Xu et al. 2021; Ragheb et al. 2020; da Silva et al. 2019;  
419 Kolarevic et al. 2019; Seifert 2013; Amanzadeh et al. 2019). Our data suggest that quercetin,  
420 isoquercitrin, and rutin might be helpful to intervene COVID-19. These compounds are plant  
421 natural flavonoids that their bio-availability, metabolism, and toxicity have been studied  
422 extensively (Hostetler et al. 2017). In general, these compounds are safe nutrients sold as  
423 supplements or in food products such as onion and common dinner table fruits (Burak et al.  
424 2017; Egert et al. 2012; Careri et al. 2003; Meng et al. 2004; Erlund et al. 2002; Snyder et al.  
425 2016). More importantly, quercetin can be absorbed into the human body from the intestines.  
426 A large number of human health studies have reported the presence of quercetin and its  
427 derivatives in the blood plasma and their nutritional benefits after consumption (Day and  
428 Williamson 2001; Shi and Williamson 2016; Mohammadi-Sartang et al. 2017; Huang et al.  
429 2020). For example, the quercetin concentration in plasma was reported to reach  $5.0 \pm 1.0 \mu$ M

430 after the intake of 150 mg in one hour (Olthof et al. 2000; de Whalley et al. 1990). In addition,  
431 these compounds are potent antioxidants (Justino et al. 2002; Terao et al. 2001). The intake of  
432 quercetin can inhibit the oxidation of LDL and prevent the cardiovascular diseases (de  
433 Whalley et al. 1990; Hertog et al. 1993a) (Manach et al. 1998). Moreover, quercetin and its  
434 derivatives have strong anti-inflammation activity (Sato and Mukai 2020; Carullo et al. 2017;  
435 Tejada et al. 2017; Li et al. 2016; Chen et al. 2016). All of these functions can benefit  
436 people's health.

437

#### 438 **Figure legends**

439

440 Figure 1 A diagram showing the function of the SARS-CoV-2 main protease in the virus  
441 replication in the host cells. Once the virus enters into the host cells. Its positive sense and  
442 single stranded RNA uses the ribosomes to translate open reading frames 1a and 1b to  
443 polyproteins (PP), in which the main protease and papain-like protease cleaves PPs to  
444 non-structural proteins (NSPs). Three NSPs, RNA dependent RNA polymerase (RdRp), RNA  
445 helicase, and exoribonuclease, are involved in the transcription of the positive RNA to  
446 negative sense and single stranded RNA, which is further transcribed to positive sense and  
447 single stranded RNA. Finally, structural proteins and a positive single stranded RNA  
448 assembly together to form a virus progeny.

449

450 Figure 2 Structures of ebselen and 10 flavonoids. Two flavan-3-ols: (-)-epicatechin and  
451 (+)-catechin; three dihydroflavonol aglycones: (+)-dihydroquercetin, (+)-dihydrokaempferol,

452 and (+)-dihydroquercetin; three flavonols aglycones, kaempferol, quercetin, and myricetin;

453 two glycosylated flavonols: quercetin-3-O-glycoside (isoquercitrin), and rutin.

454

455 Figure 3 Ligand-receptor docking modeling showing the binding of eleven compounds to the

456 substrate pocket of the SARS-CoV-2 main protease ( $M^{pro}$ ). The first image shows the 3D

457 surface view of the SARS-CoV-2  $M^{pro}$ , on which the red rectangular frame indicates the

458 substrate-binding pocket. Eleven flavonoids and ebselen bind to this pocket. Two flavan-3-ols:

459 (+)-catechin (CA) and (-)-epicatechin (EC); three dihydroflavonol aglycones:

460 (+)-dihydroquercetin (DHQ), (+)-dihydrokaempferol (DHK), and (+)-dihydroquercetin

461 (DHM); three flavonols aglycones, kaempferol, quercetin, and myricetin; two glycosylated

462 flavonols: quercetin-3-O-glycoside (isoquercitrin), and rutin.

463

464 Figure 4 Orientation features of compounds binding to subsites. a, a surface image shows the

465 four subsites in the binding pocket. b-j, images show the binding positions of nine

466 compounds. Two flavan-3-ols: (+)-catechin (CA) and (-)-epicatechin (EC); three

467 dihydroflavonol aglycones: (+)-dihydroquercetin (DHQ), (+)-dihydrokaempferol (DHK), and

468 (+)-dihydroquercetin (DHM); three flavonols aglycones, kaempferol, quercetin, and

469 myricetin; two glycosylated flavonols: quercetin-3-O-glycoside (isoquercitrin), and rutin.

470

471 Figure 5 Amino acid sequence alignment of the SARS-CoV-2's and HCoV-229E's  $M^{pro}$

472 homologs and comparison of their three dimensional (3D) models. a, amino sequence

473 alignment, in which three rectangle frames highlight three conserved domains forming the

474 substrate binding pocket; b, a comparison of the 3D models of the SARS-CoV-2's (bronze  
475 color) and HCoV-229E's (blue color) M<sup>pro</sup> homologs; c, yellowish, orange, and reddish colors  
476 showing the binding pocket formed from three conserved binding domains highlighted with  
477 three rectangle frames in a, in which the reddish and yellowish spaces include Cys-His  
478 catalytic dyad.

479

480 Figure 6 Ligand-receptor docking modeling showing the binding of eleven compounds to the  
481 substrate pocket of the HCoV-229E main protease. The first image shows the 3D surface  
482 view of the HCoV-229E M<sup>pro</sup>, on which the red rectangular frame indicates the  
483 substrate-binding pocket. Eleven flavonoids and ebselen bind to this pocket. Two flavan-3-ols:  
484 (+)-catechin (CA) and (-)-epicatechin (EC); three dihydroflavonol aglycones:  
485 (+)-dihydroquercetin (DHQ), (+)-dihydrokaempferol (DHK), and (+)-dihydroquercetin  
486 (DHM); three flavonols aglycones, kaempferol, quercetin, and myricetin; two glycosylated  
487 flavonols: quercetin-3-O-glycoside (isoquercitrin), and rutin.

488

489 Figure 7 Inhibitory effects of nine compounds on the M<sup>pro</sup> activity of SARS-CoV-2. a-g,  
490 seven plots show the inhibitory curves of seven compounds against the M<sup>pro</sup> activity. All dots  
491 in each plot are an average value calculated from five replicates. IC<sub>50</sub> value for each  
492 compound is inserted in each plot. "95% CI" means 95% confidence interval. "(value 1, value  
493 2)" means values in the range with 95% CI. h, a comparison shows the inhibitory effects of  
494 11 compounds at 100 μM on the M<sup>pro</sup> activity. GC376 is an inhibitor used as positive control.  
495 (+)-catechin, (-)-epicatechin, and water are used as negative controls. Two flavan-3-ols:

496 (+)-catechin (Ca) and (-)-epicatechin (Ep); three dihydroflavonol aglycones:  
497 (+)-dihydroquercetin (DHQ), (+)-dihydrokaempferol (DHK), and (+)-dihydroquercetin  
498 (DHM); three flavonols aglycones, kaempferol (Ka), quercetin (Qu), and myricetin (My); two  
499 glycosylated flavonols: quercetin-3-O-glycoside (isoquercitrin, Iso), and rutin.

500

501 Figure 8 Inhibition of five compounds on the replication of HCoV-229E in Huh-7 cells. a,  
502 plots were built with TCID<sub>50</sub>/mL versus concentrations of each compound. b, this plot was  
503 built with the inhibition rate (%) versus log [ $\mu$ M] values to estimate the EC<sub>50</sub> of quercetin.  
504 “95% CI” means 95% confidence interval. “(value 1, value 2)” means values in the range  
505 with 95% CI. Bars labeled with “\*” means were significant difference compared with control  
506 without adding compounds (P-value less than 0.05).

507



508 Table 1 Affinity scores of 11 compounds binding to the main proteases of SARS-CoV-2 and

509 HuCoV-229E

| Compounds       | Affinity score<br>(SARS-CoV-2) | Affinity score (229E) | Molecular weight<br>(Da) |
|-----------------|--------------------------------|-----------------------|--------------------------|
| Rutin           | -8.8                           | -7.8                  | 610.5                    |
| Isoquercitrin   | -8.7                           | -7.5                  | 464.1                    |
| Kaempferol      | -7.7                           | -7.6                  | 286.2                    |
| DHK             | -7.6                           | -7.6                  | 288.2                    |
| DHM             | -7.5                           | -7.6                  | 320.2                    |
| Myricetin       | -7.4                           | -7.1                  | 318.2                    |
| Quercetin       | -7.4                           | -7.7                  | 302.2                    |
| (+)-Taxifolin   | -7.4                           | -7.8                  | 304.2                    |
| (+)-catechin    | -7.5                           | -7.6                  | 290.2                    |
| (-)-epicatechin | -7.5                           | -7.6                  | 290.2                    |
| Ebselen         | -6.6                           | -6.0                  | 274.2                    |

510

511

512 **Reference**

- 513 Abdool Karim SS, de Oliveira T (2021) New SARS-CoV-2 variants — Clinical, Public Health, and  
514 Vaccine Implications. *New England Journal of Medicine* 384 (19):1866-1868.  
515 doi:10.1056/NEJMc2100362
- 516 Altmann DM, Boyton RJ, Beale R (2021) Immunity to SARS-CoV-2 variants of concern. *Science* 371  
517 (6534):1103-1104. doi:10.1126/science.abg7404
- 518 Amanzadeh E, Esmaeili A, Rahgozar S, Nourbakhshnia M (2019) Application of quercetin in  
519 neurological disorders: from nutrition to nanomedicine. *Rev Neurosci* 30 (5):555-572.  
520 doi:10.1515/revneuro-2018-0080
- 521 Barrett PN, Meyer H, Wachtel I, Eibl J, Dorner F (1996) Determination of the inactivation kinetics of  
522 hepatitis A virus in human plasma products using a simple TCID<sub>50</sub> assay. *J Med Virol* 49  
523 (1):1-6. doi:10.1002/(sici)1096-9071(199605)49:1<1::Aid-jmv1>3.0.Co;2-a
- 524 Bucknall RA, Chanock RM, Kapikian AZ, King LM (1972) Studies with human coronaviruses. 2. Some  
525 properties of strains 229E and OC43. *Proc Soc Exp Biol Med* 139 (3):722-&
- 526 Bull-Otterson L, Gray EB, Budnitz DS, Strosnider HM, Schieber LZ, Courtney J, García MC, Brooks JT,  
527 Kenzie WRM, Gundlapalli AV (2020) Hydroxychloroquine and Chloroquine Prescribing  
528 Patterns by Provider Specialty Following Initial Reports of Potential Benefit for COVID-19  
529 Treatment — United States, January–June 2020. *Morbidity and Mortality Weekly Report* 69  
530 (35):1210–1215
- 531 Burak C, Brull V, Langguth P, Zimmermann BF, Stoffel-Wagner B, Sausen U, Stehle P, Wolfram S,  
532 Egert S (2017) Higher plasma quercetin levels following oral administration of an onion skin  
533 extract compared with pure quercetin dihydrate in humans. *Eur J Nutr* 56 (1):343-353.

534 doi:10.1007/s00394-015-1084-x

535 Cao B, Wang Y, Wen D, Liu W, Wang J, Fan G, Ruan L, Song B, Cai Y, Wei M, Li X, Xia J, Chen N,  
536 Xiang J, Yu T, Bai T, Xie X, Zhang L, Li C, Yuan Y, Chen H, Li H, Huang H, Tu S, Gong F, Liu  
537 Y, Wei Y, Dong C, Zhou F, Gu X, Xu J, Liu Z, Zhang Y, Li H, Shang L, Wang K, Li K, Zhou X,  
538 Dong X, Qu Z, Lu S, Hu X, Ruan S, Luo S, Wu J, Peng L, Cheng F, Pan L, Zou J, Jia C, Wang  
539 J, Liu X, Wang S, Wu X, Ge Q, He J, Zhan H, Qiu F, Guo L, Huang C, Jaki T, Hayden FG,  
540 Horby PW, Zhang D, Wang C (2020) A Trial of Lopinavir-Ritonavir in Adults Hospitalized with  
541 Severe Covid-19. *N Engl J Med* 382 (19):1787-1799. doi:10.1056/NEJMoa2001282

542 Careri M, Corradini C, Elviri L, Nicoletti I, Zagnoni I (2003) Direct HPLC analysis of quercetin and  
543 trans-resveratrol in red wine, grape, and winemaking byproducts. *J Agric Food Chem* 51  
544 (18):5226-5231

545 Carullo G, Cappello AR, Frattaruolo L, Badolato M, Armentano B, Aiello F (2017) Quercetin and  
546 derivatives: useful tools in inflammation and pain management. *Future Med Chem* 9 (1):79-93.  
547 doi:10.4155/fmc-2016-0186

548 CDC, FDA (2021) Allergic Reactions Including Anaphylaxis After Receipt of the First Dose of Moderna  
549 COVID-19 Vaccine — United States, December 21, 2020–January 10, 2021. *Morbidity and*  
550 *Mortality Weekly Report* 70 (4):125–129

551 Chen L, Gui C, Luo X, Yang Q, Gunther S, Scandella E, Drosten C, Bai D, He X, Ludewig B, Chen J,  
552 Luo H, Yang Y, Yang Y, Zou J, Thiel V, Chen K, Shen J, Shen X, Jiang H (2005) Cinanserin is  
553 an inhibitor of the 3C-like proteinase of severe acute respiratory syndrome coronavirus and  
554 strongly reduces virus replication in vitro. *J Virol* 79 (11):7095-7103.  
555 doi:10.1128/JVI.79.11.7095-7103.2005

- 556 Chen S, Jiang HM, Wu XS, Fang J (2016) Therapeutic Effects of Quercetin on Inflammation, Obesity,  
557 and Type 2 Diabetes. *Mediat Inflamm* 2016:5. doi:10.1155/2016/9340637
- 558 Chen Y, Liu Q, Guo D (2020) Emerging coronaviruses: Genome structure, replication, and  
559 pathogenesis. *J Med Virol*. doi:10.1002/jmv.26234
- 560 Cheng ZK, Sun G, Guo W, Huang YY, Sun WH, Zhao F, Hu KH (2015) Inhibition of hepatitis B virus  
561 replication by quercetin in human hepatoma cell lines. *Virologica Sinica* 30 (4):261-268.  
562 doi:10.1007/s12250-015-3584-5
- 563 Chopra M, Fitzsimons PEE, Strain JJT, Thurnham DI, Howard AN (2000) Nonalcoholic red wine  
564 extract and quercetin inhibit LDL oxidation without affecting plasma antioxidant vitamin and  
565 carotenoid concentrations. *Clin Chem* 46 (8):1162-1170
- 566 Chuck CP, Chen C, Ke ZH, Wan DCC, Chow HF, Wong KB (2013) Design, synthesis and  
567 crystallographic analysis of nitrile-based broad-spectrum peptidomimetic inhibitors for  
568 coronavirus 3C-like proteases. *Eur J Med Chem* 59:1-6. doi:10.1016/j.ejmech.2012.10.053
- 569 Cohen J (2021) South Africa suspends use of AstraZeneca's COVID-19 vaccine after it fails to clearly  
570 stop virus variant. *Science*. AAAS, News
- 571 da Silva ER, Brogi S, Lucon JF, Campiani G, Gemma S, Maquiaveli CD (2019) Dietary polyphenols  
572 rutin, taxifolin and quercetin related compounds target *Leishmania amazonensis* arginase.  
573 *Food Funct* 10 (6):3172-3180. doi:10.1039/c9fo00265k
- 574 Dai W, Zhang B, Jiang XM, Su H, Li J, Zhao Y, Xie X, Jin Z, Peng J, Liu F, Li C, Li Y, Bai F, Wang H,  
575 Cheng X, Cen X, Hu S, Yang X, Wang J, Liu X, Xiao G, Jiang H, Rao Z, Zhang LK, Xu Y, Yang  
576 H, Liu H (2020) Structure-based design of antiviral drug candidates targeting the SARS-CoV-2  
577 main protease. *Science* 368 (6497):1331-1335. doi:10.1126/science.abb4489

- 578 Day AJ, Williamson G (2001) Biomarkers for exposure to dietary flavonoids: a review of the current  
579 evidence for identification of quercetin glycosides in plasma. *Br J Nutr* 86:S105-S110.  
580 doi:10.1079/bjn2001342
- 581 de Vries JHM, Hollman PCH, Meyboom S, Buysman M, Zock PL, van Staveren WA, Katan MB (1998)  
582 Plasma concentrations and urinary excretion of the antioxidant flavonols quercetin and  
583 kaempferol as biomarkers for dietary intake. *Am J Clin Nutr* 68 (1):60-65
- 584 de Whalley CV, Rankin SM, Houtt JR, Jessup W, Leake DS (1990) Flavonoids inhibit the oxidative  
585 modification of low density lipoproteins by macrophages. *Biochem Pharmacol* 39  
586 (11):1743-1750. doi:10.1016/0006-2952(90)90120-a
- 587 Dewi BE, Desti H, Ratningpoeti E, Sudiro M, Fithriyah, Angelina M, Iop (2020) Effectivity of quercetin  
588 as antiviral to dengue virus-2 strain New Guinea C in Huh 7-it 1 cell line. In: 3rd International  
589 Conference on Natural Products and Bioresource Sciences, vol 462. IOP Conference  
590 Series-Earth and Environmental Science. Iop Publishing Ltd, Bristol.  
591 doi:10.1088/1755-1315/462/1/012033
- 592 Ding Q, Lu P, Fan Y, Xia Y, Liu M (2020) The clinical characteristics of pneumonia patients coinfectd  
593 with 2019 novel coronavirus and influenza virus in Wuhan, China. *J Med Virol*.  
594 doi:10.1002/jmv.25781
- 595 Dooling K, Marin M, Wallace M, McClung N, Chamberland M, Lee GM, Talbot HK, Romero JR, Bell BP,  
596 Oliver SE (2021) The Advisory Committee on Immunization Practices' Updated Interim  
597 Recommendation for Allocation of COVID-19 Vaccine — United States, December 2020.  
598 *Morbidity and Mortality Weekly Report* 69 (5152):1657-1660
- 599 dos Santos AE, Kuster RM, Yamamoto KA, Salles TS, Campos R, de Meneses MDF, Soares MR,

- 600 Ferreira D (2014) Quercetin and quercetin 3-O-glycosides from *Bauhinia longifolia* (Bong.)  
601 Steud. show anti-Mayaro virus activity. *Parasites Vectors* 7:7. doi:10.1186/1756-3305-7-130
- 602 Eger S, Wolfram S, Bosy-Westphal A, Boesch-Saadatmandi C, Wagner AE, Frank J, Rimbach G,  
603 Mueller MJ (2008) Daily quercetin supplementation dose-dependently increases plasma  
604 quercetin concentrations in healthy humans. *J Nutr* 138 (9):1615-1621
- 605 Eger S, Wolfram S, Schulze B, Langguth P, Hubbermann EM, Schwarz K, Adolphi B, Bosy-Westphal  
606 A, Rimbach G, Muller MJ (2012) Enriched cereal bars are more effective in increasing plasma  
607 quercetin compared with quercetin from powder-filled hard capsules. *Br J Nutr* 107  
608 (4):539-546. doi:10.1017/s0007114511003242
- 609 Erlund I, Silaste ML, Alfthan G, Rantala M, Kesaniemi YA, Aro A (2002) Plasma concentrations of the  
610 flavonoids hesperetin, naringenin and quercetin in human subjects following their habitual  
611 diets, and diets high or low in fruit and vegetables. *Eur J Clin Nutr* 56 (9):891-898.  
612 doi:10.1038/sj.ejcn.1601409
- 613 Farsani SMJ, Dijkman R, Jebbink MF, Goossens H, Ieven M, Deijs M, Molenkamp R, van der Hoek L  
614 (2012) The first complete genome sequences of clinical isolates of human coronavirus 229E.  
615 *Virus Genes* 45 (3):433-439. doi:10.1007/s11262-012-0807-9
- 616 Fehr AR, Perlman S (2015) Coronaviruses: An Overview of Their Replication and Pathogenesis. In:  
617 Maier HJ, Bickerton E, Britton P (eds) *Coronaviruses: Methods and Protocols*. Springer New  
618 York, New York, NY, pp 1-23. doi:10.1007/978-1-4939-2438-7\_1
- 619 Fontanet A, Autran B, Lina B, Kieny MP, Karim SSA, Sridhar D (2021) SARS-CoV-2 variants and  
620 ending the COVID-19 pandemic. *The Lancet* 397 (10278):952-954.  
621 doi:10.1016/S0140-6736(21)00370-6

- 622 Fowler ZL, Koffas MA (2009) Biosynthesis and biotechnological production of flavanones: current state  
623 and perspectives. *Appl Microbiol Biotechnol* 83 (5):799-808. doi:10.1007/s00253-009-2039-z
- 624 Friedman N, Jacob-Hirsch J, Drori Y, Eran E, Kol N, Nayshool O, Mendelson E, Rechavi G,  
625 Mandelboim M (2021) Transcriptomic profiling and genomic mutational analysis of Human  
626 coronavirus (HCoV)-229E-infected human cells. *PLoS One* 16 (2):15.  
627 doi:10.1371/journal.pone.0247128
- 628 Gaunt ER, Hardie A, Claas ECJ, Simmonds P, Templeton KE (2010) Epidemiology and clinical  
629 presentations of the four human coronaviruses 229E, HKU1, NL63, and OC43 detected over 3  
630 years using a novel multiplex real-time PCR method. *J Clin Microbiol* 48 (8):2940-2947.  
631 doi:10.1128/jcm.00636-10
- 632 Gharpure R, Guo A, Bishnoi CK, Patel U, Gifford D, Tippins A, Jaffe A, Shulman E, Stone N, Mungai E,  
633 Bagchi S, Bell J, Srinivasan A, Patel A, Link-Gelles R (2021) Early COVID-19 First-Dose  
634 Vaccination Coverage Among Residents and Staff Members of Skilled Nursing Facilities  
635 Participating in the Pharmacy Partnership for Long-Term Care Program — United States,  
636 December 2020–January 2021. *Morbidity and Mortality Weekly Report* 70(5):178–182
- 637 Hertog MG, Feskens EJ, Hollman PC, Katan MB, Kromhout D (1993a) Dietary antioxidant flavonoids  
638 and risk of coronary heart disease: the Zutphen Elderly Study. *Lancet* 342 (8878):1007-1011.  
639 doi:10.1016/0140-6736(93)92876-u
- 640 Hertog MGL, Feskens EJM, Hollman PCH, Katan MB, Kromhout D (1993b) Dietary antioxidant  
641 flavonols and risk of coronary heart disease- the Zutphen elderly study. *Lancet* 342:1007-1011
- 642 Hierholzer JC (1976) Purification and biophysical properties of human coronavirus 229E. *Virology* 75  
643 (1):155-165. doi:10.1016/0042-6822(76)90014-3

- 644 Hoffmann M, Kleine-Weber H, Schroeder S, Krüger N, Herrler T, Erichsen S, Schiergens TS, Herrler G,  
645 Wu N-H, Nitsche A, Müller MA, Drosten C, Pöhlmann S (2020) SARS-CoV-2 cell entry  
646 depends on ACE2 and TMPRSS2 and is blocked by a clinically proven protease inhibitor. Cell  
647 181 (2):271-280.e278. doi:<https://doi.org/10.1016/j.cell.2020.02.052>
- 648 Holshue ML, DeBolt C, Lindquist S, Lofy KH, Wiesman J, Bruce H, Spitters C, Ericson K, Wilkerson S,  
649 Tural A, Diaz G, Cohn A, Fox L, Patel A, Gerber SI, Kim L, Tong S, Lu X, Lindstrom S,  
650 Pallansch MA, Weldon WC, Biggs HM, Uyeki TM, Pillai SK, Washington State -nCoV CIT  
651 (2020) First Case of 2019 Novel Coronavirus in the United States. N Engl J Med 382  
652 (10):929-936. doi:10.1056/NEJMoa2001191
- 653 Hostetler GL, Ralston RA, Schwartz SJ (2017) Flavones: Food Sources, Bioavailability, Metabolism,  
654 and Bioactivity. Adv Nutr 8 (3):423-435. doi:10.3945/an.116.012948
- 655 Huang HH, Liao D, Dong Y, Pu R (2020) Effect of quercetin supplementation on plasma lipid profiles,  
656 blood pressure, and glucose levels: a systematic review and meta-analysis. Nutr Rev 78  
657 (8):615-626. doi:10.1093/nutrit/nuz071
- 658 Hussain S, Pan J, Chen Y, Yang Y, Xu J, Peng Y, Wu Y, Li Z, Zhu Y, Tien P, Guo D (2005)  
659 Identification of novel subgenomic RNAs and noncanonical transcription initiation signals of  
660 severe acute respiratory syndrome coronavirus. J Virol 79 (9):5288-5295.  
661 doi:10.1128/JVI.79.9.5288-5295.2005
- 662 Jin Z, Du X, Xu Y, Deng Y, Liu M, Zhao Y, Zhang B, Li X, Zhang L, Peng C, Duan Y, Yu J, Wang L,  
663 Yang K, Liu F, Jiang R, Yang X, You T, Liu X, Yang X, Bai F, Liu H, Liu X, Guddat LW, Xu W,  
664 Xiao G, Qin C, Shi Z, Jiang H, Rao Z, Yang H (2020) Structure of M(pro) from SARS-CoV-2  
665 and discovery of its inhibitors. Nature 582 (7811):289-293. doi:10.1038/s41586-020-2223-y



- 666 Justino G, Santos M, Mira L (2002) Plasma metabolites of quercetin and their antioxidant potential.  
667 Free Radic Biol Med 33:S203-S203
- 668 Kärber G (1931) Beitrag zur kollektiven Behandlung pharmakologischer Reihenversuche.  
669 Naunyn-Schmiedebergs Archiv für experimentelle Pathologie und Pharmakologie 162  
670 (4):480-483. doi:10.1007/BF01863914
- 671 Kenilworth NJ (2021) Merck discontinues development of SARS-CoV2/COVID-19 vaccine candidates;  
672 continues development of two investigational therapeutic candidates. BUSINESS WIRE,
- 673 Kennedy DA, Johnsonlussenburg CM (1976) Isolation and morphology of internal component of  
674 human coronavirus, strain 229E. Intervirology 6 (4-5):197-206
- 675 Kim JH, Marks F, Clemens JD (2021) Looking beyond COVID-19 vaccine phase 3 trials. Nature  
676 Medicine. doi:10.1038/s41591-021-01230-y
- 677 Kim Y, Liu H, Galasiti Kankanamalage AC, Weerasekara S, Hua DH, Groutas WC, Chang KO,  
678 Pedersen NC (2016) Reversal of the Progression of Fatal Coronavirus Infection in Cats by a  
679 Broad-Spectrum Coronavirus Protease Inhibitor. PLoS Pathog 12 (3):e1005531.  
680 doi:10.1371/journal.ppat.1005531
- 681 Knoll MD, Wonodi C (2021) Oxford-AstraZeneca COVID-19 vaccine efficacy. The Lancet 397  
682 (10269):72-74. doi:10.1016/S0140-6736(20)32623-4
- 683 Kolarevic A, Pavlovic A, Djordjevic A, Lazarevic J, Savic S, Kocic G, Anderluh M, Smelcerovic A (2019)  
684 Rutin as Deoxyribonuclease I Inhibitor. Chem Biodivers 16 (5):9. doi:10.1002/cbdv.201900069
- 685 Kolhir VK, Bykov VA, Baginskaja AI, Sokolov SY, Glazova NG, Leskova TE, Sakovich GS, Tjukavkina  
686 NA, Kolesnik YA, Rulenko IA (1996) Antioxidant activity of a dihydroquercetin isolated from  
687 Larix gmelinii (Rupr) Rupr wood. Phytother Res 10 (6):478-482

- 688 Lee CC, Kuo CJ, Ko TP, Hsu MF, Tsui YC, Chang SC, Yang S, Chen SJ, Chen HC, Hsu MC, Shih SR,  
689 Liang PH, Wang AHJ (2009) Structural Basis of Inhibition Specificities of 3C and 3C-like  
690 Proteases by Zinc-coordinating and Peptidomimetic Compounds. *J Biol Chem* 284  
691 (12):7646-7655. doi:10.1074/jbc.M807947200
- 692 Li Y, Yao JY, Han CY, Yang JX, Chaudhry MT, Wang SN, Liu HN, Yin YL (2016) Quercetin,  
693 Inflammation and Immunity. *Nutrients* 8 (3):14. doi:10.3390/nu8030167
- 694 Logue J, Licona WV, Cooper TK, Reeder B, Byrum R, Qin J, Murphy ND, Cong Y, Bonilla A, Sword J,  
695 Weaver W, Kocher G, Olinger GG, Jahrling PB, Hensley LE, Bennett RS (2019) Ebola virus  
696 isolation using Huh-7 cells has methodological advantages and similar sensitivity to isolation  
697 using other cell types and suckling BALB/c laboratory mice. *Viruses-Basel* 11 (2):14.  
698 doi:10.3390/v11020161
- 699 Macnaughton MR, Madge MH (1978) Genome of human coronavirus strain 229E. *J Gen Virol* 39  
700 (JUN):497-504. doi:10.1099/0022-1317-39-3-497
- 701 Manach C, Morand C, Crespy V, Demigne C, Texier O, Regeat F, Remesy C (1998) Quercetin is  
702 recovered in human plasma as conjugated derivatives which retain antioxidant properties.  
703 *FEBS Lett* 426 (3):331-336. doi:10.1016/s0014-5793(98)00367-6
- 704 McCarthy KR, Rennick LJ, Nambulli S, Robinson-McCarthy LR, Bain WG, Haidar G, Duprex WP (2020)  
705 Natural deletions in the SARS-CoV-2 spike glycoprotein drive antibody escape.  
706 bioRxiv:2020.2011.2019.389916. doi:10.1101/2020.11.19.389916
- 707 Mehrbod P, Hudy D, Shyntum D, Markowski J, Los MJ, Ghavami S (2021) Quercetin as a natural  
708 therapeutic candidate for the treatment of influenza virus. *Biomolecules* 11 (1):29.  
709 doi:10.3390/biom11010010

- 710 Meng XF, Maliakal P, Lu H, Lee MJ, Yang CS (2004) Urinary and plasma levels of resveratrol and  
711 quercetin in humans, mice, and rats after ingestion of pure compounds and grape juice. *J*  
712 *Agric Food Chem* 52 (4):935-942. doi:10.1021/jf030582e
- 713 Mohammadi-Sartang M, Mazloom Z, Sherafatmanesh S, Ghorbani M, Firoozi D (2017) Effects of  
714 supplementation with quercetin on plasma C-reactive protein concentrations: a systematic  
715 review and meta-analysis of randomized controlled trials. *Eur J Clin Nutr* 71 (9):1033-1039.  
716 doi:10.1038/ejcn.2017.55
- 717 Moon JH, Tsushida T, Nakahara K, Terao J (2001) Identification of quercetin 3-O-beta-D-glucuronide  
718 as an antioxidative metabolite in rat plasma after oral administration of quercetin. *Free Radic*  
719 *Biol Med* 30 (11):1274-1285. doi:10.1016/s0891-5849(01)00522-6
- 720 Murota K, Terao J (2003) Antioxidative flavonoid quercetin: implication of its intestinal absorption and  
721 metabolism. *Archives of Biochemistry and Biophysics* 417:12-17
- 722 Nakabayashi H, Taketa K, Yamane T, Miyazaki M, Miyano K, Sato J (1984) Phenotypical stability of a  
723 human hepatoma-cell line, Huh-7, in long-term culture with chemically defined medium. *Gann*  
724 75 (2):151-158
- 725 Olthof MR, Hollman PC, Vree TB, Katan MB (2000) Bioavailabilities of quercetin-3-glucoside and  
726 quercetin-4'-glucoside do not differ in humans. *J Nutr* 130 (5):1200-1203.  
727 doi:10.1093/jn/130.5.1200
- 728 Painter EM, Ussery EN, Patel A, Hughes MM, Zell ER, Moulia DL, Scharf LG, Lynch M, Ritchey MD,  
729 Toblin RL, Murthy BP, Harris LQ, Wasley A, Rose DA, Cohn A, Messonnier NE (2021)  
730 Demographic Characteristics of Persons Vaccinated During the First Month of the COVID-19  
731 Vaccination Program — United States, December 14, 2020–January 14, 2021. *Morbidity and*

- 732 Mortality Weekly Report 70 (5):174–177
- 733 Parvez MK, Al-Dosari MS, Arbab AH, Al-Rehaily AJ, Abdelwahid MAS (2020) Bioassay-guided  
734 isolation of anti-hepatitis B virus flavonoid myricetin-3-O-rhamnoside along with quercetin from  
735 *Guiera senegalensis* leaves. Saudi Pharm J 28 (5):550-559. doi:10.1016/j.jsps.2020.03.006
- 736 Petra M, Steven K, Mahesh Shanker D, Guido P, Bo M, Swapnil M, Charlie W, Thomas M, Isabella F,  
737 Rawlings D, Dami AC, Sujeet S, Rajesh P, Robin M, Meena D, Shantanu S, Kalaiarasan P,  
738 Radhakrishnan VS, Adam A, Niluka G, Jonathan B, Oscar C, Partha C, Priti D, Daniela C, Tom  
739 P, Dr Chand W, Neeraj G, Raju V, Meenakshi A, The Indian S-C-GC, Citiid-Nihr BioResource  
740 Covid-19 Collaboration AM, o Hyeon L, Wendy SB, Samir B, Seth F, Leo J, Partha R, Anurag  
741 A, Ravindra KG (2021) SARS-CoV-2 B.1.617.2 Delta variant emergence and vaccine  
742 breakthrough. Nature Portfolio. doi:10.21203/rs.3.rs-637724/v1
- 743 Prior AM, Kim YJ, Weerasekara S, Moroze M, Alliston KR, Uy RAZ, Groutas WC, Chang KO, Hua DH  
744 (2013) Design, synthesis, and bioevaluation of viral 3C and 3C-like protease inhibitors. Bioorg  
745 Med Chem Lett 23 (23):6317-6320. doi:10.1016/j.bmcl.2013.09.070
- 746 Qiu XG, Kroeker A, He SH, Kozak R, Audet J, Mbikay M, Chretien M (2016) Prophylactic Efficacy of  
747 Quercetin 3-beta-O-D-Glucoside against Ebola Virus Infection. Antimicrob Agents Chemother  
748 60 (9):5182-5188. doi:10.1128/aac.00307-16
- 749 Ragheb SR, El Wakeel LM, Nasr MS, Sabri NA (2020) Impact of rutin and vitamin C combination on  
750 oxidative stress and glycemic control in patients with type 2 diabetes. Clin Nutr ESPEN  
751 35:128-135. doi:10.1016/j.clnesp.2019.10.015
- 752 Ramajayam R, Tan KP, Liang PH (2011) Recent development of 3C and 3CL protease inhibitors for  
753 anti-coronavirus and anti-picornavirus drug discovery. Biochem Soc Trans 39 (5):1371-1375.

- 754           doi:10.1042/BST0391371
- 755   Ren Z, Yan L, Zhang N, Guo Y, Yang C, Lou Z, Rao Z (2013) The newly emerged SARS-like  
756           coronavirus HCoV-EMC also has an "Achilles' heel": current effective inhibitor targeting a  
757           3C-like protease. *Protein Cell* 4 (4):248-250. doi:10.1007/s13238-013-2841-3
- 758   Sato S, Mukai Y (2020) Modulation of chronic inflammation by quercetin: The beneficial effects on  
759           obesity. *J Inflamm Res* 13:421-431. doi:10.2147/jir.S228361
- 760   Seifert J (2013) Role of Quercetin in Sports Nutrition. *Nutrition and Enhanced Sports Performance: Muscle Building, Endurance, and Strength*. Elsevier Academic Press Inc, San Diego.  
761           doi:10.1016/b978-0-12-396454-0.00052-7
- 762           doi:10.1016/b978-0-12-396454-0.00052-7
- 763   Shi YL, Williamson G (2016) Quercetin lowers plasma uric acid in pre-hyperuricaemic males: a  
764           randomised, double-blinded, placebo-controlled, cross-over trial. *Br J Nutr* 115 (5):800-806.  
765           doi:10.1017/s0007114515005310
- 766   Shih CM, Lo SCJ, Miyamura T, Chen SY, Lee YHW (1993) Suppression of hepatitis-B virus expression  
767           and replication by hepatitis-C virus core protein in Huh-7 cells. *Journal of Virology* 67  
768           (10):5823-5832. doi:10.1128/jvi.67.10.5823-5832.1993
- 769   Shirato K, Kanou K, Kawase M, Matsuyama S (2017) Clinical isolates of human coronavirus 229E  
770           bypass the endosome for cell entry. *Journal of Virology* 91 (1):12. doi:10.1128/jvi.01387-16
- 771   Shirato K, Kawase M, Watanabe O, Hirokawa C, Matsuyama S, Nishimura H, Taguchi F (2012)  
772           Differences in neutralizing antigenicity between laboratory and clinical isolates of HCoV-229E  
773           isolated in Japan in 2004-2008 depend on the S1 region sequence of the spike protein. *J Gen  
774           Virol* 93:1908-1917. doi:10.1099/vir.0.043117-0
- 775   Snyder SM, Zhao BX, Luo T, Kaiser C, Cavender G, Hamilton-Reeves J, Sullivan DK, Shay NF (2016)

- 776 Consumption of Quercetin and Quercetin-Containing Apple and Cherry Extracts Affects Blood  
777 Glucose Concentration, Hepatic Metabolism, and Gene Expression Patterns in Obese  
778 C57BL/6J High Fat-Fed Mice. *J Nutr* 146 (5):1001-1007. doi:10.3945/jn.115.228817
- 779 Spearman C (1908) The method of 'Right and Wrong Cases' ('Constant stimuli') without Gauss's  
780 formulae. *Br J Psychol* 2:227-242. doi:10.1111/j.2044-8295.1908.tb00176.x
- 781 Tejada S, Nabavi SM, Capo X, Martorell M, Bibiloni MD, Tur JA, Pons A, Sureda A (2017) Quercetin  
782 effects on exercise induced oxidative stress and inflammation. *Curr Org Chem* 21 (4):348-356.  
783 doi:10.2174/1385272820666161017122202
- 784 Terao J, Yamaguchi S, Shirai M, Miyoshi M, Moon JH, Oshima S, Inakuma T, Tsushida T, Kato Y  
785 (2001) Protection by quercetin and quercetin 3-O-beta-glucuronide of peroxynitrite-induced  
786 antioxidant consumption in human plasma low-density lipoprotein. *Free Radic Res* 35  
787 (6):925-931. doi:10.1080/10715760100301421
- 788 Teselkin YO, Babenkova IV, Kolhir VK, Baginskaya AI, Tjukavkina NA, Kolesnik YA, Selivanova IA,  
789 Eichholz AA (2000) Dihydroquercetin as a means of antioxidative defence in rats with  
790 tetrachloromethane hepatitis. *Phytother Res* 14 (3):160-162.  
791 doi:10.1002/(sici)1099-1573(200005)14:3<160::Aid-ptr555>3.0.Co;2-y
- 792 Teselkin YO, Babenkova IV, Tjukavkina NA, Rulenko IA, Kolesnik YA, Kolhir VK, Eichholz AA (1998)  
793 Influence of dihydroquercetin on the lipid peroxidation of mice during post-radiation period.  
794 *Phytother Res* 12 (7):517-519.  
795 doi:10.1002/(sici)1099-1573(199811)12:7<517::Aid-ptr342>3.0.Co;2-d
- 796 Thongsri P, Sa-ngiamsuntorn K, Sithisarn P, Chomnawang MT, Thirapanmethee K (2019) *Cladogynos*  
797 *orientalis* Zipp. extracts inhibit cell culture-derived hepatitis C virus genotype 2a replication in

- 798 Huh-7 cells through NS5B inhibition. *Asian Pac Trop Biomed* 9 (8):346-352.  
799 doi:10.4103/2221-1691.262079
- 800 Walensky RP, Walke HT, Fauci AS (2021) SARS-CoV-2 Variants of Concern in the United  
801 States—Challenges and Opportunities. *JAMA* 325 (11):1037-1038.  
802 doi:10.1001/jama.2021.2294
- 803 Wang C, Horby PW, Hayden FG, Gao GF (2020a) A novel coronavirus outbreak of global health  
804 concern. *Lancet* 395 (10223):470-473. doi:10.1016/S0140-6736(20)30185-9
- 805 Wang M, Cao R, Zhang L, Yang X, Liu J, Xu M, Shi Z, Hu Z, Zhong W, Xiao G (2020b) Remdesivir and  
806 chloroquine effectively inhibit the recently emerged novel coronavirus (2019-nCoV) in vitro.  
807 *Cell Res* 30 (3):269-271. doi:10.1038/s41422-020-0282-0
- 808 Weidmann AE (2012) Dihydroquercetin: More than just an impurity? *Eur J Pharmacol* 684 (1-3):19-26.  
809 doi:10.1016/j.ejphar.2012.03.035
- 810 WHO (2020a) Director-General's opening remarks at the media briefing on COVID-19-11 March 2020.
- 811 WHO (2020b) Statement on the second meeting of the International Health Regulations (2005)  
812 Emergency Committee regarding the outbreak of novel coronavirus (2019-nCoV). World  
813 Health Organization,
- 814 Wong G, He SH, Siragam V, Bi YH, Mbikay M, Chretien M, Qiu XG (2017) Antiviral activity of  
815 quercetin-3-beta-O-D-glucoside against Zika virus infection. *Virol Sin* 32 (6):545-547.  
816 doi:10.1007/s12250-017-4057-9
- 817 Woo PCY, Huang Y, Lau SKP, Yuen K-Y (2010) Coronavirus genomics and bioinformatics analysis.  
818 *Viruses* 2 (8):1804-1820
- 819 Xie D-Y, Dixon RA (2005) Proanthocyanidin biosynthesis - still more questions than answers?

- 820           Phytochemistry 66 (18):2127-2144
- 821   Xie D-Y, Jackson LA, Cooper JD, Ferreira D, Paiva NL (2004) Molecular and biochemical analysis of  
822           two cDNA clones encoding dihydroflavonol-4-reductase from *Medicago truncatula*. Plant  
823           Physiol 134 (3):979-994. doi:10.1104/pp.103.030221
- 824   Xu Z, Li XQ, Yang H, Poolsawat L, Wang P, Leng XJ (2021) Dietary rutin promoted the growth, serum  
825           antioxidant response and flesh collagen, free amino acids contents of grass carp  
826           (*Ctenopharyngodon idella*). Aquac Nutr 27 (2):544-555. doi:10.1111/anu.13205
- 827   Yan R, Zhang Y, Li Y, Xia L, Guo Y, Zhou Q (2020) Structural basis for the recognition of SARS-CoV-2  
828           by full-length human ACE2. Science 367 (6485):1444-1448. doi:10.1126/science.abb2762
- 829   Yang H, Xie W, Xue X, Yang K, Ma J, Liang W, Zhao Q, Zhou Z, Pei D, Ziebuhr J, Hilgenfeld R, Yuen  
830           KY, Wong L, Gao G, Chen S, Chen Z, Ma D, Bartlam M, Rao Z (2005) Design of  
831           wide-spectrum inhibitors targeting coronavirus main proteases. PLoS Biol 3 (10):e324.  
832           doi:10.1371/journal.pbio.0030324
- 833   Ye G, Wang X, Tong X, Shi Y, Fu ZF, Peng G (2020) Structural Basis for Inhibiting Porcine Epidemic  
834           Diarrhea Virus Replication with the 3C-Like Protease Inhibitor GC376. Viruses 12 (2).  
835           doi:10.3390/v12020240
- 836   Zhang L, Liu Y (2020) Potential interventions for novel coronavirus in China: A systematic review. J  
837           Med Virol 92 (5):479-490. doi:10.1002/jmv.25707
- 838   Zhao P, Praissman JL, Grant OC, Cai Y, Xiao T, Rosenbalm KE, Aoki K, Kellman BP, Bridger R,  
839           Barouch DH, Brindley MA, Lewis NE, Tiemeyer M, Chen B, Woods RJ, Wells L (2020)  
840           Virus-receptor interactions of glycosylated SARS-CoV-2 spike and human ACE2 receptor. Cell  
841           Host Microbe 28 (4):586-601.e586. doi:10.1016/j.chom.2020.08.004



- 842 Zhu N, Zhang D, Wang W, Li X, Yang B, Song J, Zhao X, Huang B, Shi W, Lu R, Niu P, Zhan F, Ma X,  
843 Wang D, Xu W, Wu G, Gao GF, Tan W, China Novel Coronavirus I, Research T (2020) A  
844 Novel Coronavirus from Patients with Pneumonia in China, 2019. *N Engl J Med* 382  
845 (8):727-733. doi:10.1056/NEJMoa2001017
- 846 Zhu Y, Xie D-Y (2020) Docking characterization and in vitro inhibitory activity of flavan-3-ols and  
847 dimeric proanthocyanidins against the main protease activity of SARS-Cov-2. *Front Plant Sci*  
848 11 (1884). doi:10.3389/fpls.2020.601316
- 849 Ziebuhr J, Herold J, Siddell SG (1995) Characterization of a human coronavirus (strain 229E) 3C-like  
850 proteinase activity. *Journal of Virology* 69 (7):4331-4338. doi:10.1128/jvi.69.7.4331-4338.1995
- 851 Ziebuhr J, Heusipp G, Seybert A, Siddell SG (1998) Substrate specificity of the human coronavirus  
852 229E 3C-like proteinase. In: Enjuanes L, Siddell SG, Spaan W (eds) *Coronaviruses and*  
853 *Arteriviruses*, vol 440. *Advances in Experimental Medicine and Biology*. Plenum Press Div  
854 Plenum Publishing Corp, New York, pp 115-120
- 855 Ziebuhr J, Heusipp G, Siddell SG (1997) Biosynthesis, purification, and characterization of the human  
856 coronavirus 229E 3C-like proteinase. *Journal of Virology* 71 (5):3992-3997.  
857 doi:10.1128/jvi.71.5.3992-3997.1997
- 858

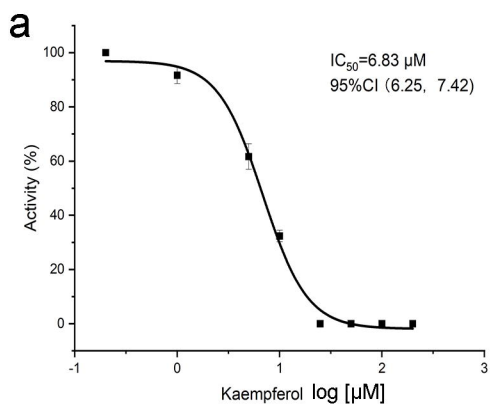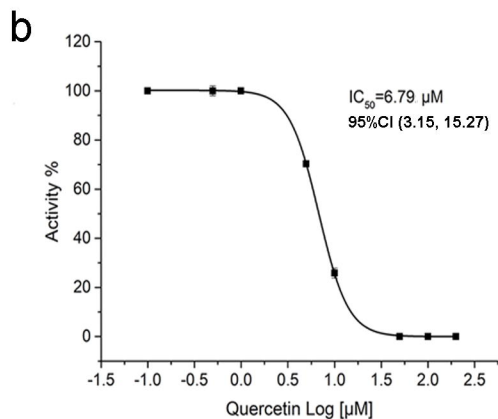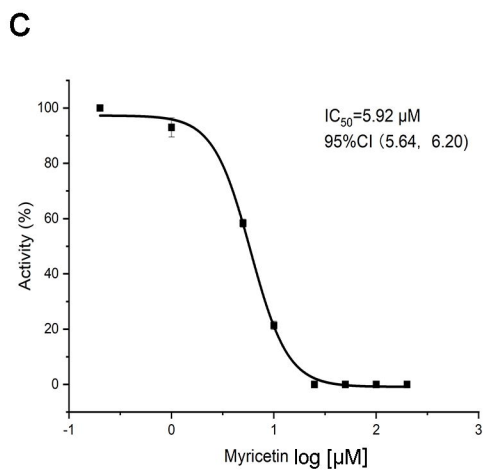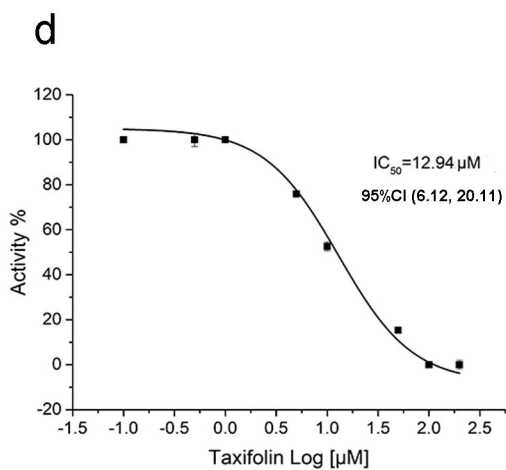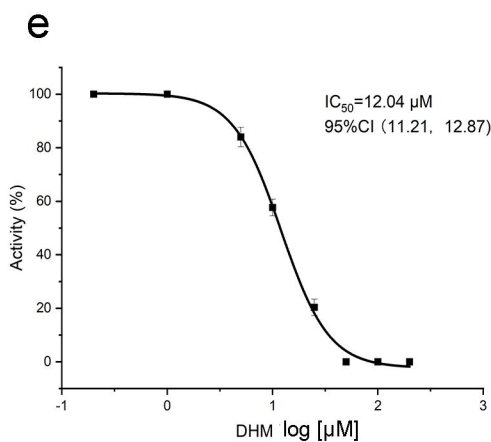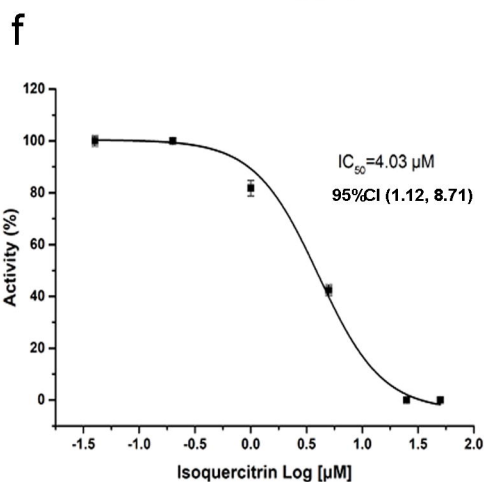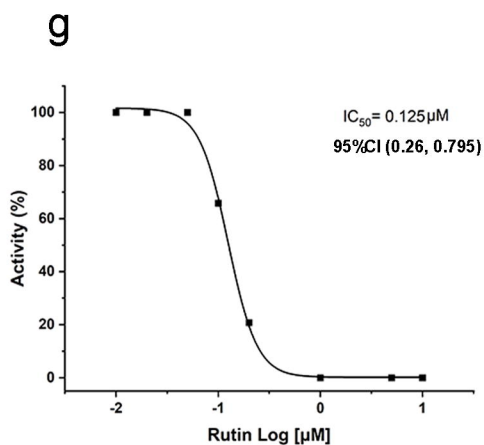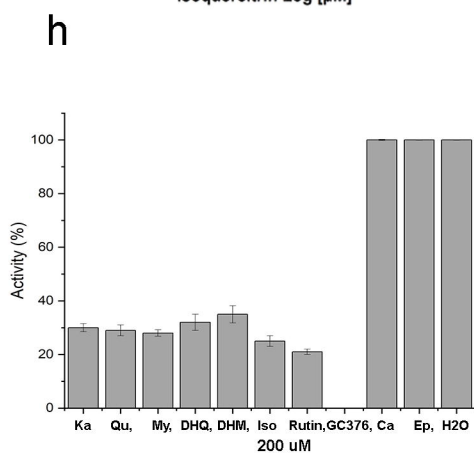

**a**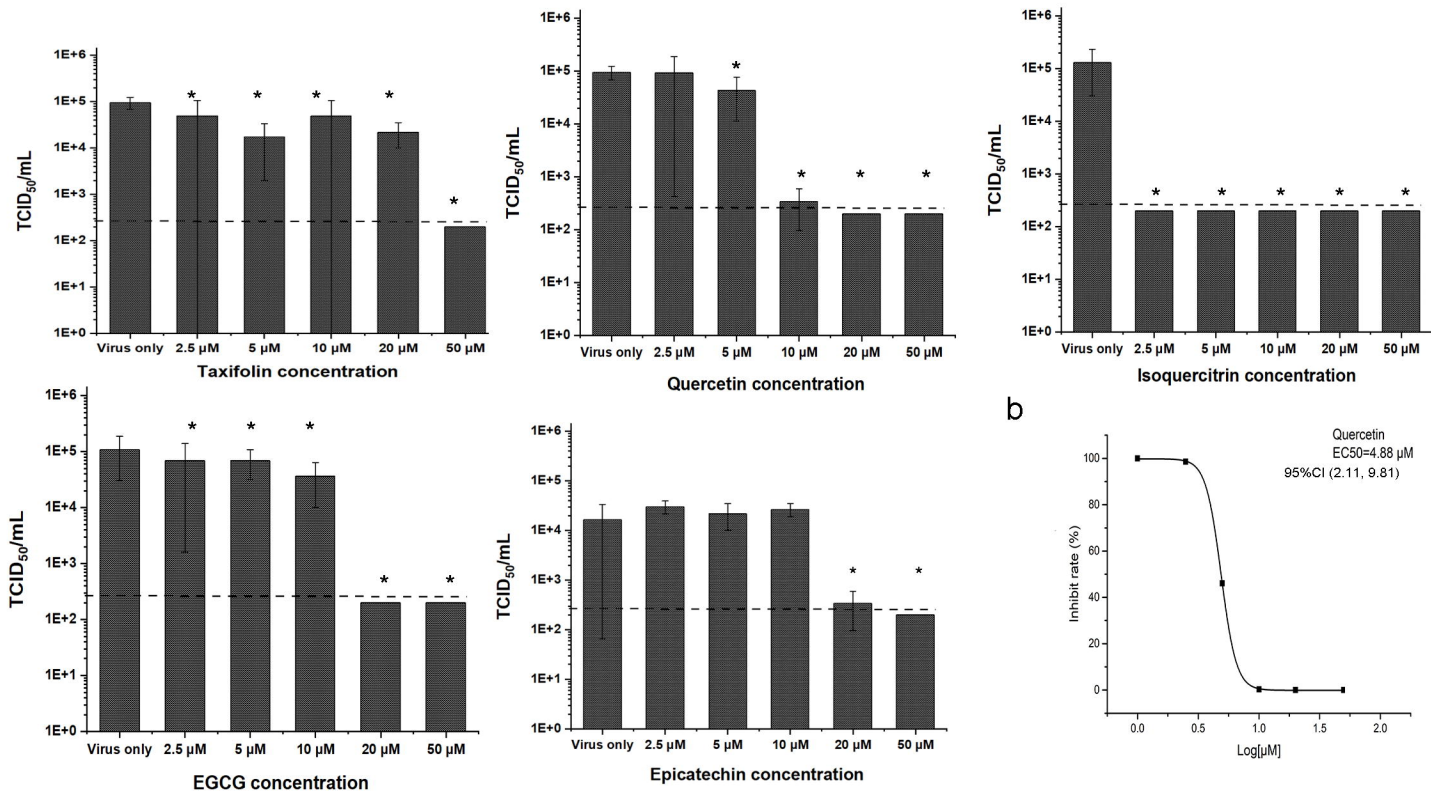**b**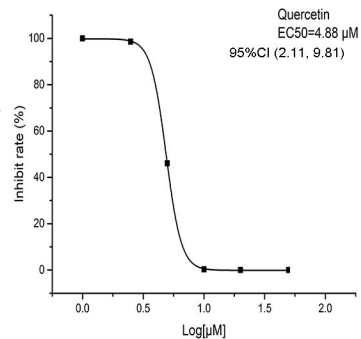

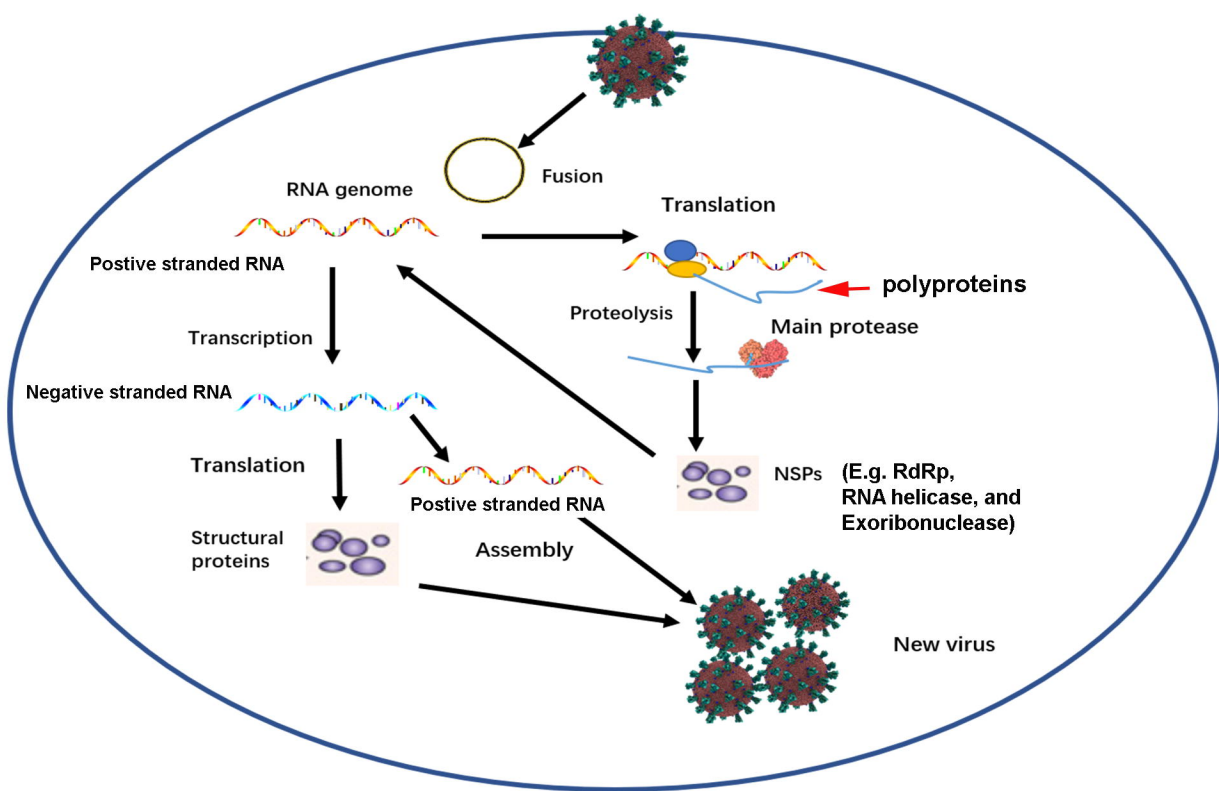

RNA genome

Fusion

Translation

Positive stranded RNA

polyproteins

Transcription

Proteolysis

Main protease

Negative stranded RNA

Translation

NSPs (E.g. RdRp, RNA helicase, and Exoribonuclease)

Positive stranded RNA

Structural proteins

Assembly

New virus

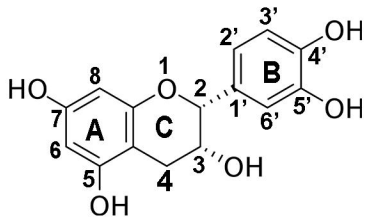

**(-)-Epicatechin**

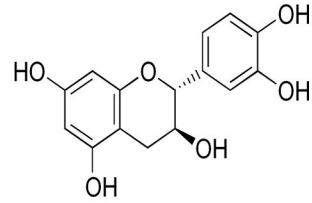

**(+)-Catechin**

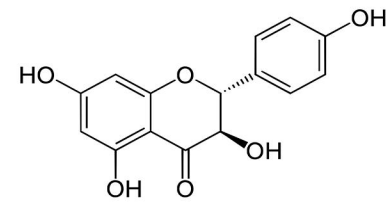

**(+)-Dihydrokaempferol (DHK)**

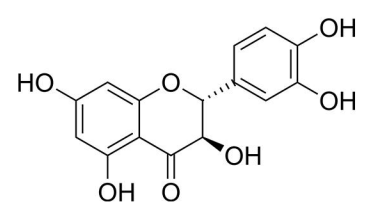

**(+)-Dihydroquercetin (DHQ)**

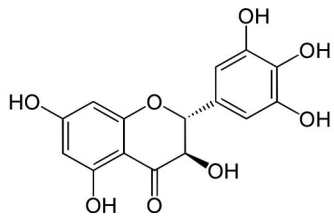

**(+)-Dihydromyricetin (DHM)**

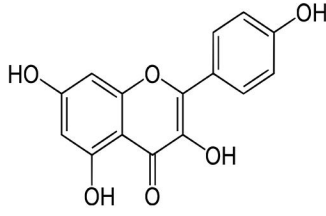

**Kaempferol**

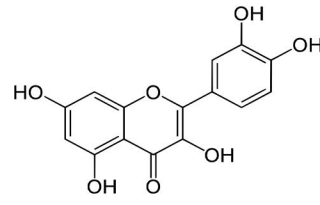

**Quercetin**

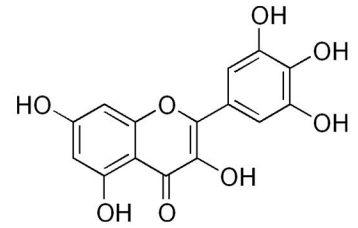

**Myricetin**

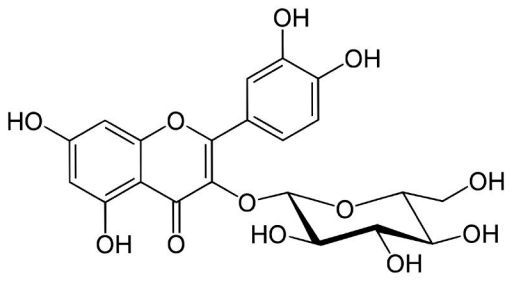

**Quercetin-3-O-glycoside**

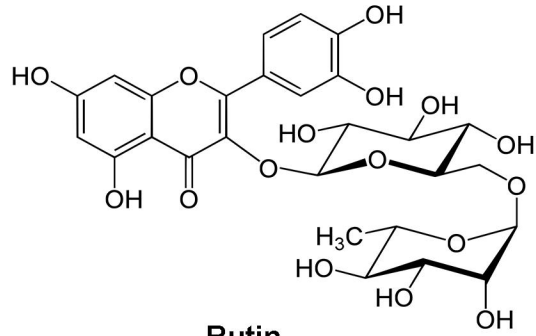

**Rutin**

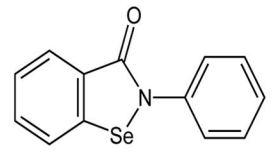

**Ebselen**

**Binding Site**

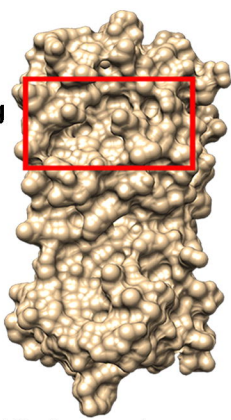

**Main protease**

**Ebselen**

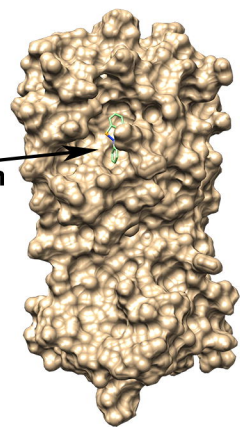

**CA**

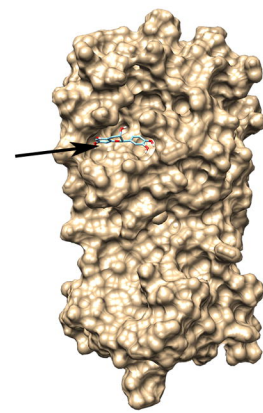

**EC**

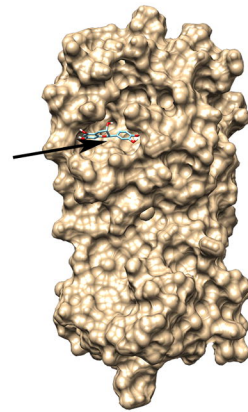

**DHK**

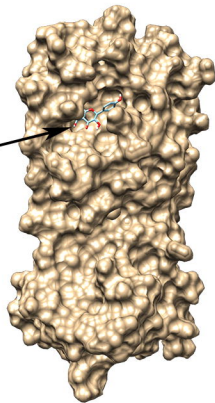

**DHQ**

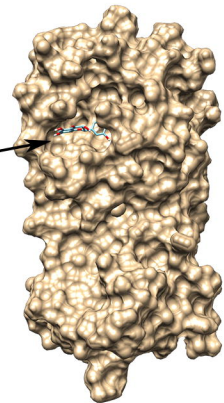

**DHM**

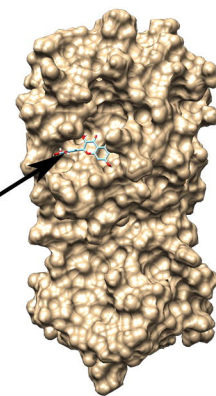

**Kaempferol**

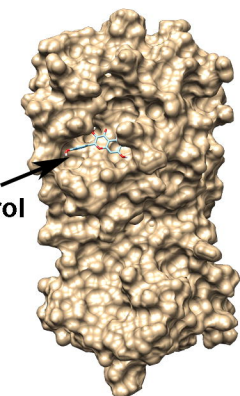

**Quercetin**

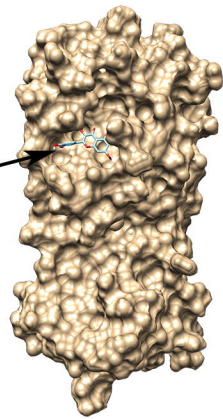

**Myricetin**

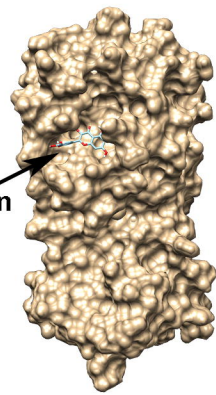

**Isoquercetrin**

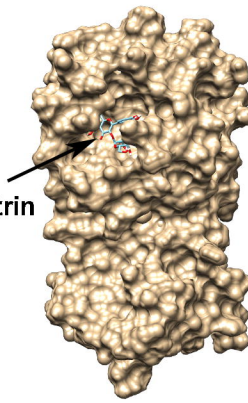

**Rutin**

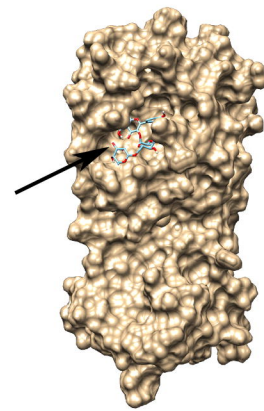

a

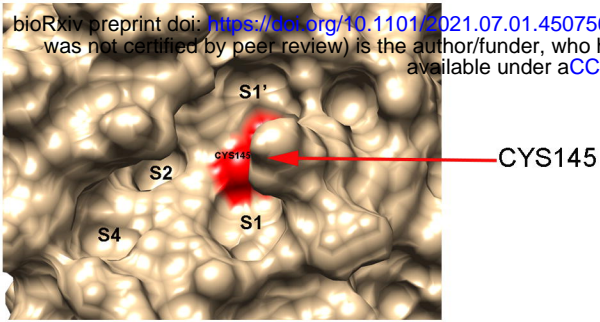

b

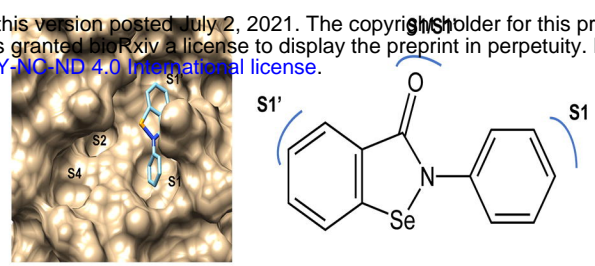

c

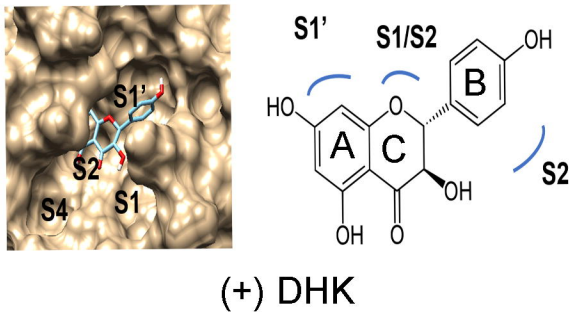

d

Ebselen

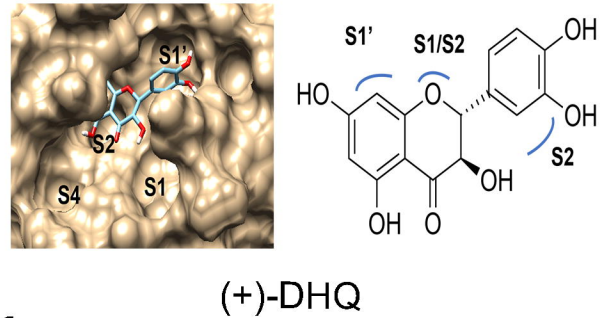

e

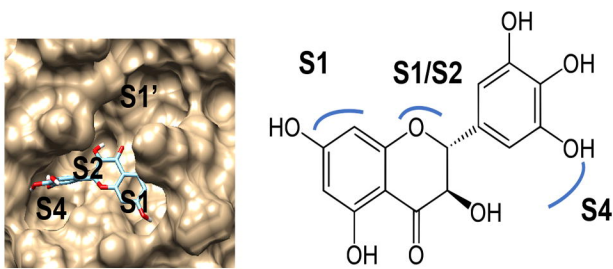

f

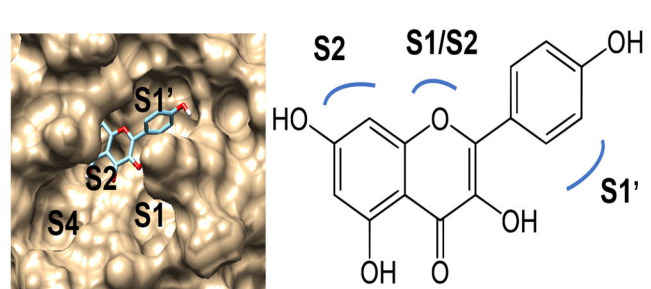

g

(+) DHM

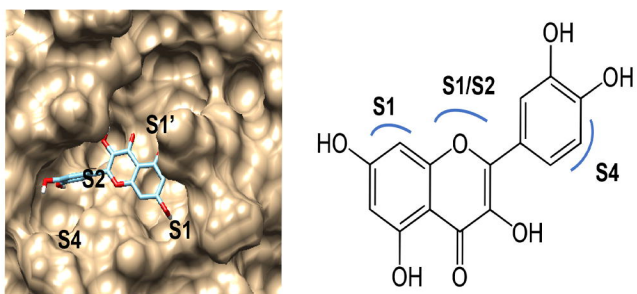

h

Kaempferol

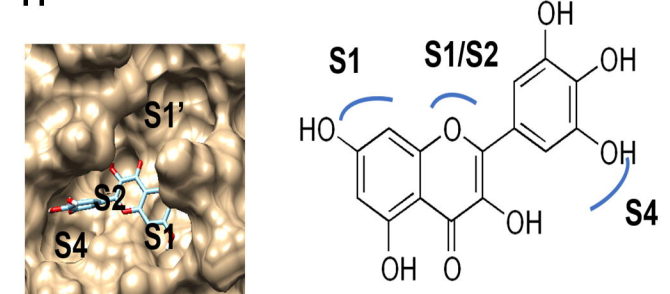

i

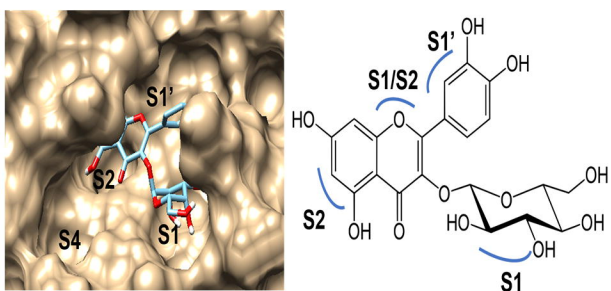

j

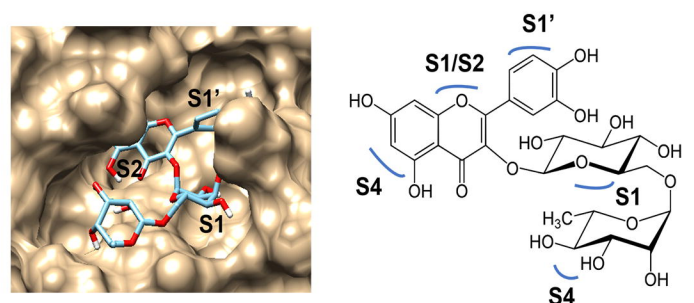

**a**

|            |                                                              |        |                   |     |
|------------|--------------------------------------------------------------|--------|-------------------|-----|
| hCov-229E  | AGLRKMAQPSGFVEKCVVRVCYGNLVLNGLWLGDI                          | YCPRHV | ASNTTS-AIDYDHEYSI | 59  |
| SARS-Cov-2 | SGFRKMAFPSPGKVEGCMVQVTCGTTLNGLWLDLV                          | YCPRHV | CTSEDMLNPNYEDLLIR | 60  |
|            | :*:**** **                                                   | :*     | :**               |     |
|            |                                                              |        |                   |     |
| hCov-229E  | MRLHNFSIISGTAFLGVVGMHGVTLKIKVSQTNMHTPRHSFRTLKSGEGFNILACYDG   |        |                   | 119 |
| SARS-Cov-2 | KSNHNFLVQAGNVQLRVIGHSMQNCVLKLVDTANPKTPKYKFRIRIQPGQTFVSLACYNG |        |                   | 120 |
|            | *** : :*. * ** :*. .**:**. * :***:.*                         |        |                   |     |
|            |                                                              |        |                   |     |
| hCov-229E  | CAQGVFGVNMRTNWTIRGSFIN                                       | ACGSPQ | YNLKNGEVE         | 179 |
| SARS-Cov-2 | SPSGVYQCAMRPNFTIKGSFLN                                       | SCGSVQ | FNIDYCVS          | 180 |
|            | . .**:                                                       | ** **  | ** **             |     |
|            |                                                              |        |                   |     |
| hCov-229E  | MYGGFEDQPNLQVESANQMLTVNVVAFLYAAILNGCTWWLKGKLFVEHYNEWAQANGFT  |        |                   | 239 |
| SARS-Cov-2 | FYGPVDRQTAQAAGTDTITVNVLAWLYAAVINGDRWFLNRFITTLNDFNLVAMKYNYE   |        |                   | 240 |
|            | :** * * : . * . : : ** ** : ** ** : ** *                     |        |                   |     |
|            |                                                              |        |                   |     |
| hCov-229E  | AMNG--EDAFSILAAKTGVVERLL-HAIQVLNNGFGGKQILGYSSLNDEFSINEVVKQM  |        |                   | 296 |
| SARS-Cov-2 | PLTQDHDVILGPLSAQTGIAVLDMCASLKELLQNGMNGRTILGSALLEDEFTPFVVRQC  |        |                   | 300 |
|            | :. * :. * ** ** : *                                          |        |                   |     |
|            |                                                              |        |                   |     |
| hCov-229E  | FGVNLQ                                                       | 302    |                   |     |
| SARS-Cov-2 | SGVTFQ                                                       | 306    |                   |     |
|            | ** . :*                                                      |        |                   |     |

**b**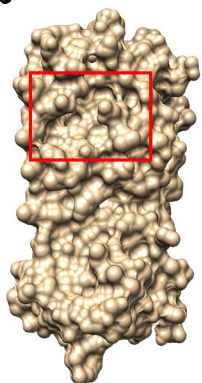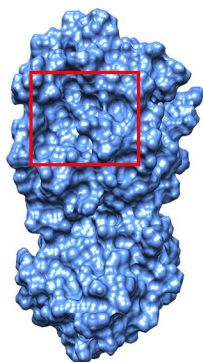**c**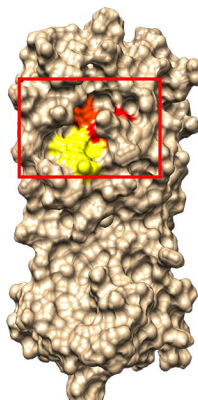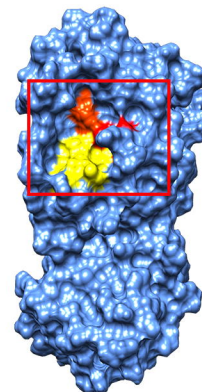



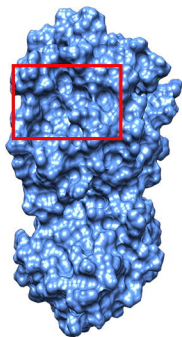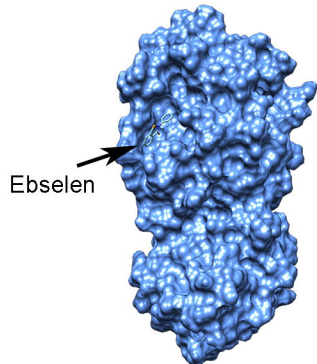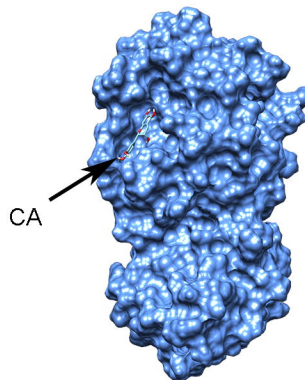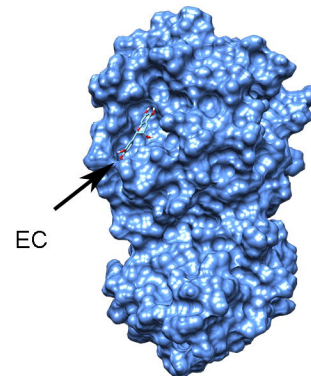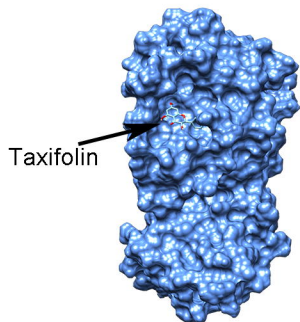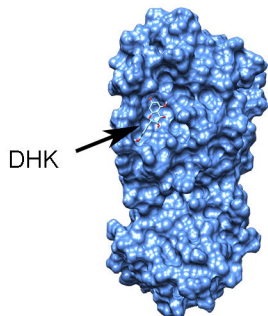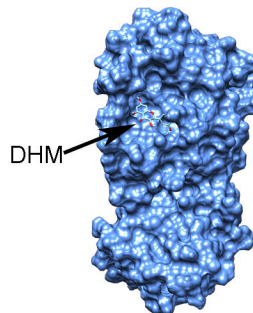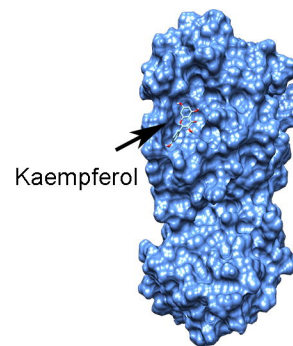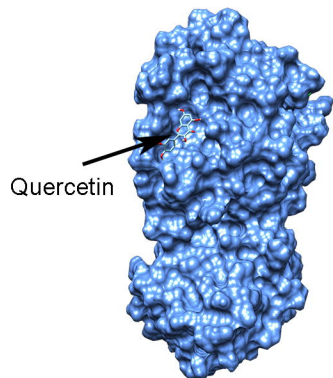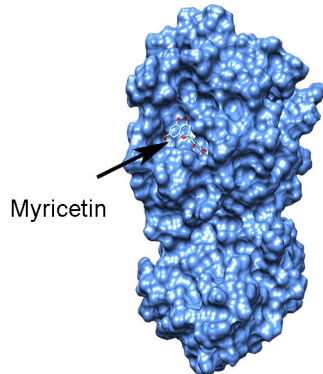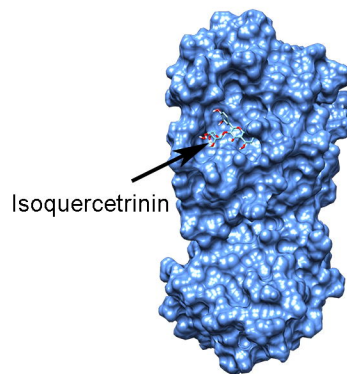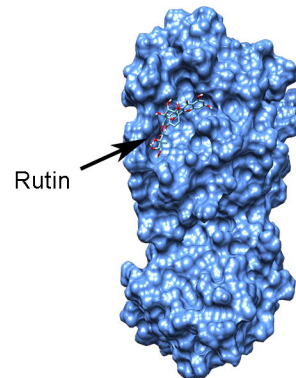

Source: https://www.biorxiv.org/content/10.1101/2021.07.01.450756v1.full.pdf
